# Supplementary material for: The Matricellular Protein R-Spondin 2 Promotes Midbrain Dopaminergic Neurogenesis and Differentiation
Source: PubMed Central journal article supplement — Stem Cell Reports. 2018 Aug 23;11(3):651–64. doi: 10.1016/j.stemcr.2018.07.014 (PMC6135723; doi:10.1016/j.stemcr.2018.07.014), 2018-08-23
Supplement: mmc1.pdf [file mmc1.pdf]

**Stem Cell Reports, Volume 11**

**Supplemental Information**

**The Matricellular Protein R-Spondin 2 Promotes Midbrain Dopaminergic Neurogenesis and Differentiation**

**Daniel Gyllborg, Maqsood Ahmed, Enrique M. Toledo, Spyridon Theofilopoulos, Shanzheng Yang, Charles French-Constant, and Ernest Arenas**

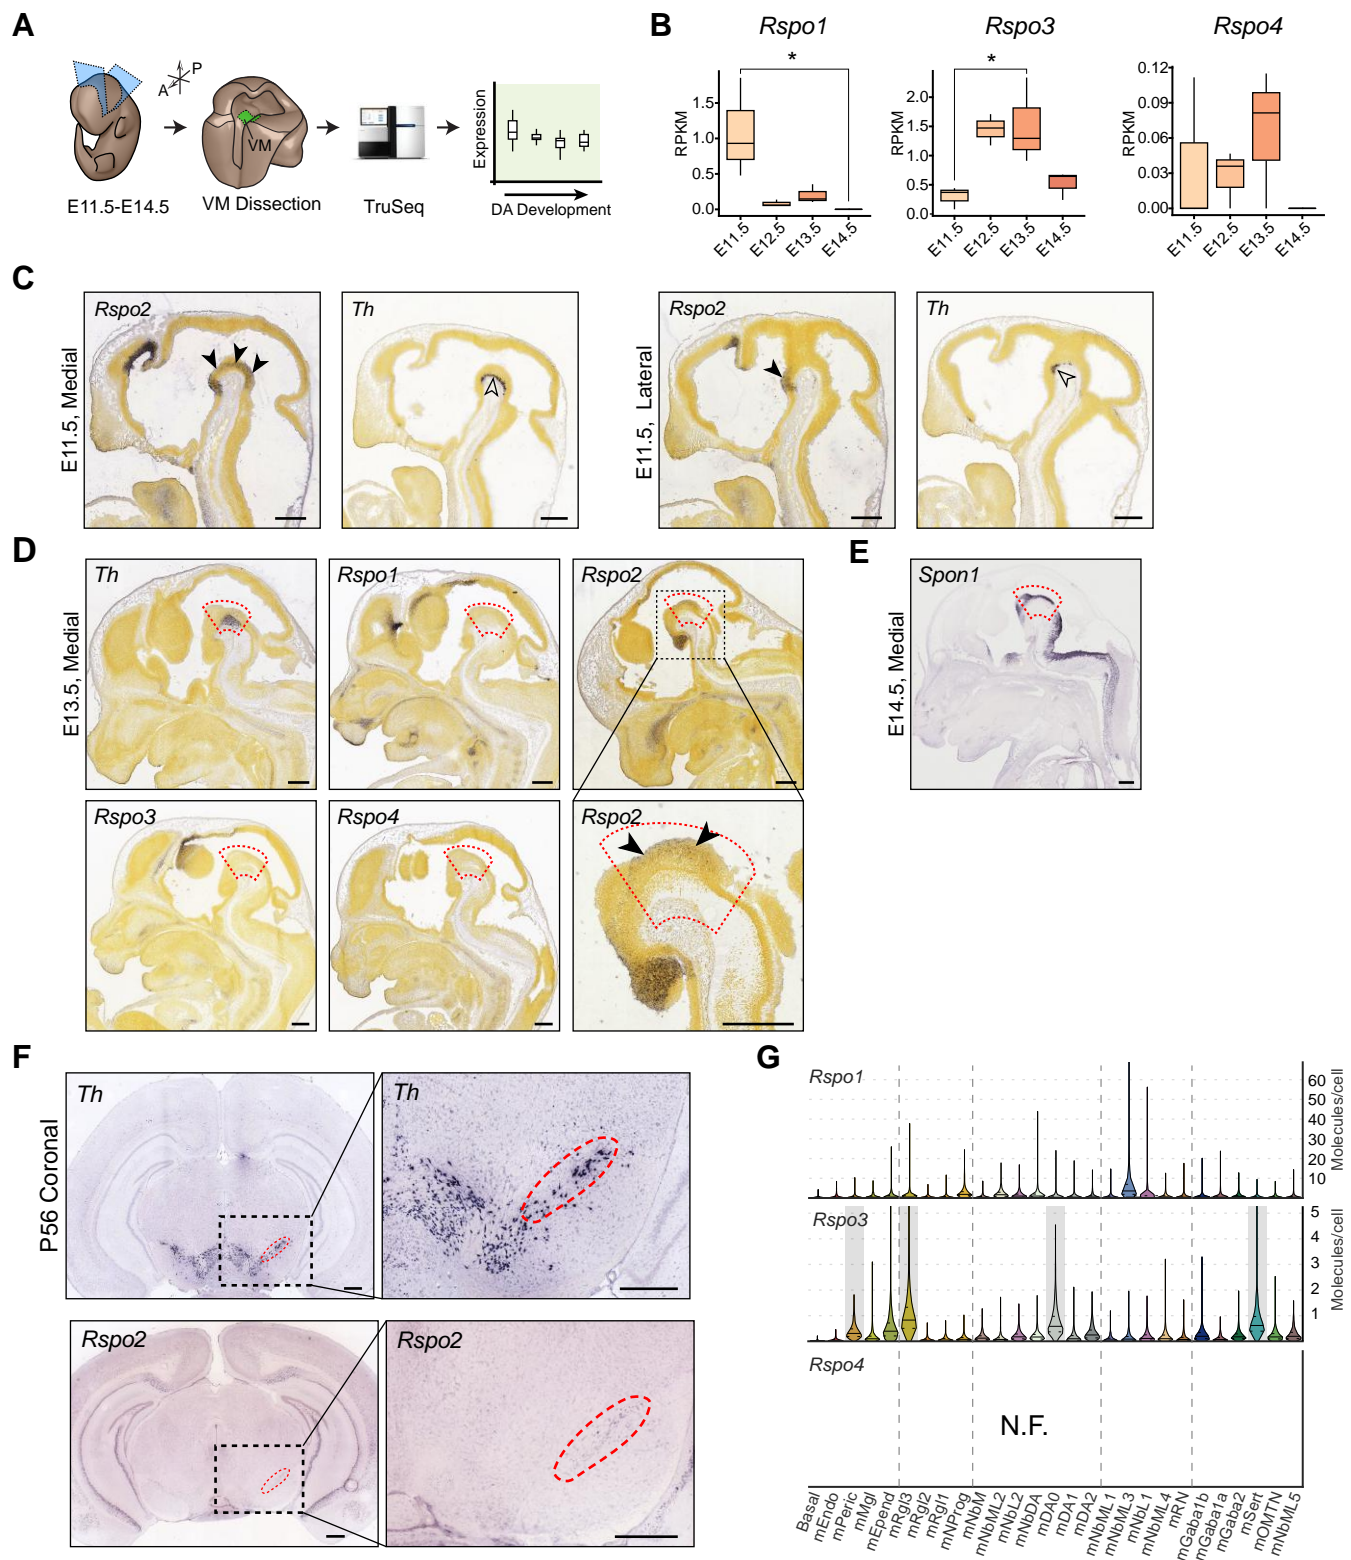

**Figure S1. Expression of Spondins in ventral midbrain development. Related to Figure 1.**

(A) Scheme of TruSeq experiment, VM region dissected from *TH-GFP* mice followed by Illumina sequencing.

(B) Expression levels of *Rspo1*, *Rspo3* and *Rspo4* by TruSeq RNA-seq analysis of VM tissue obtained from *TH-GFP* mice over time points E11.5 to E14.5 (Toledo et al., 2017a).

(C) Lower magnification of Figure 1D of E11.5 mouse VM ISH (image data from Allen Institute for Brain Science: Allen Developing Mouse Brain Atlas) for *Rspo2* (solid arrowheads) and *Th* (open arrowheads). Sagittal sections. Scale bar, 500  $\mu$ m.

(D) E13.5 mouse head ISH (image data from Allen Institute for Brain Science: Allen Developing Mouse Brain Atlas) for *Th* (VM outlined in red) and *Rspo(1-4)* at E13.5. Sagittal sections through the midline and lateral. Scale bars, 500  $\mu$ m.

(E) E14.5 mouse head ISH (image data from GenePaint, Set ID:EB2268 ) for *Spon1*. VM outlined in red. Sagittal section through midline. Scale bar, 500  $\mu$ m.

(F) P56 mouse brain ISH (image data from Allen Institute for Brain Science: Allen Mouse Brain Atlas) for *Th* and *Rspo2*. SNc outlined in red. Coronal sections. Scale bars, 500  $\mu$ m.

(G) Violin plots generated from single-cell RNA-seq data of the developing mouse VM. *Rspo1*, *Rspo3* and *Rspo4* expression levels are shown across all known cell types. Right axis shows absolute molecule counts (N.F. = not found). Grey, enriched over baseline with posterior probability >99.8%. For cell type nomenclature, see La Manno et al., 2016.

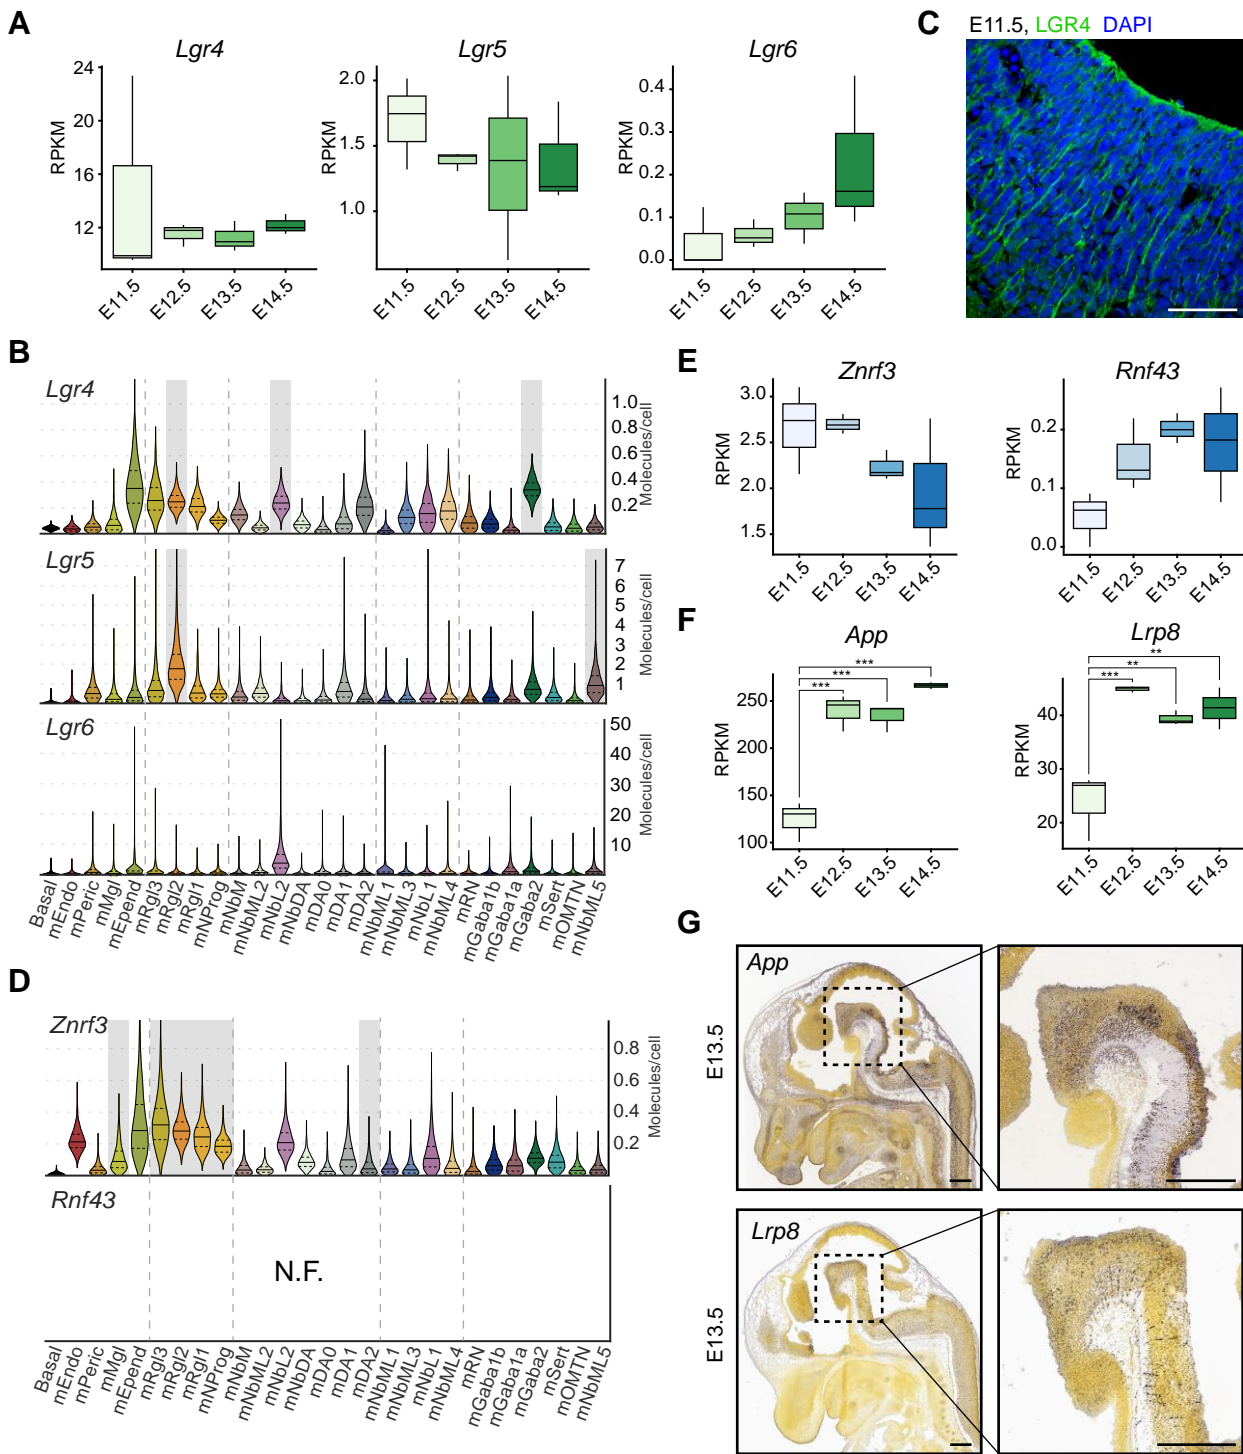

**Figure S2. Expression patterns of Spondin-associated receptors. Related to Figure 2.**

(A) Expression levels of *Lgr4*, *Lgr5*, and *Lgr6* by TruSeq RNA-seq analysis of VM tissue obtained from *TH-GFP* mice over timepoints E11.5 to E14.5 (Toledo et al., 2017a).

(B) Violin plots generated from single-cell RNA-seq data of the developing mouse VM. *Lgr4*, *Lgr5*, and *Lgr6* expression levels are shown across all known cell types. Right axis shows absolute molecule counts. Grey, enriched over baseline with posterior probability >99.8%. For cell type nomenclature, see La Manno et al., 2016.

(C) Detection of LGR4 in the midbrain by IHC, at E11.5. Scale bar, 50  $\mu$ m.

(D) Violin plots generated from single-cell RNA-seq data of the developing mouse VM. *Znr3* and *Rnf43* expression levels are shown across all known cell types. Right axis shows absolute molecule counts (N.F. = not found). Grey, enriched over baseline with posterior probability >99.8%. For cell type nomenclature, see La Manno et al., 2016.

(E) Expression levels of *Znr3* and *Rnf43* by TruSeq RNA-seq analysis of VM tissue obtained from *TH-GFP* mice over timepoints E11.5 to E14.5 (Toledo et al., 2017a).

(F) Expression levels of *App* and *Lrp8* by TruSeq RNA-seq analysis of VM tissue obtained from *TH-GFP* mice over timepoints E11.5 to E14.5 (Toledo et al., 2017a).

(G) E13.5 mouse head ISH (image data from Allen Institute for Brain Science: Allen Developing Mouse Brain Atlas) for *App* and *Lrp8* at E13.5. Sagittal sections through the midline. Scale bars, 500  $\mu$ m.

**A**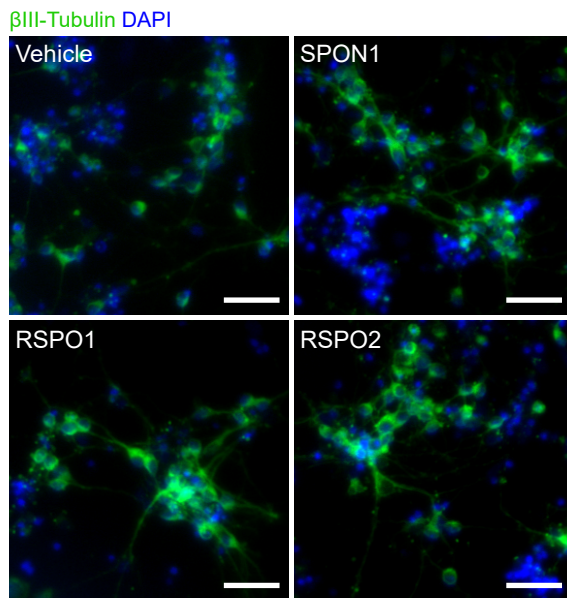**B**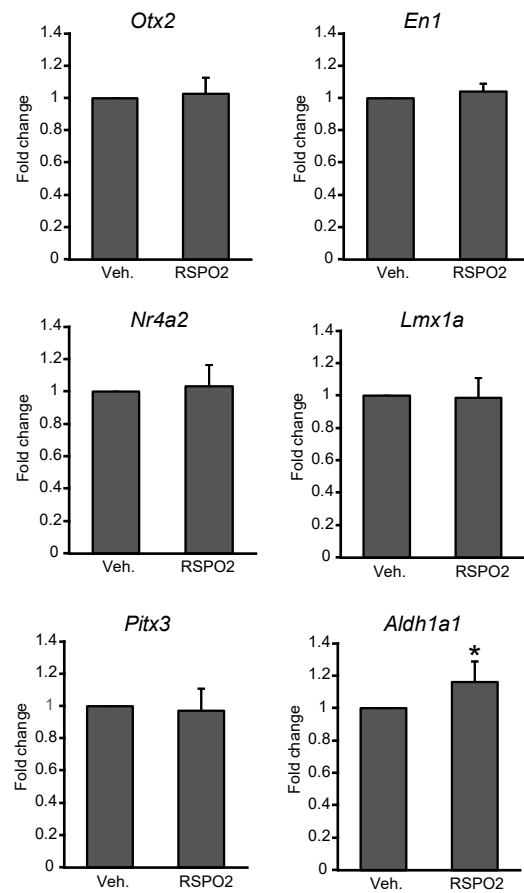

**Figure S3. Primary mouse cell culture. Related to Figure 3 and Table S1.**

(A) ICC staining with  $\beta$ III-tubulin antibodies and DAPI showed no differences between conditions. Scale bar, 50  $\mu$ m.

(B) Expression of *Otx2*, *En1*, *Nr4a2*, *Lmx1a*, *Pitx3*, and *Aldh1a1* measured by qPCR at the end primary cell culture. Statistical analysis compared to Vehicle treated control. \* $p < 0.05$  by t-test. Data presented as means  $\pm$  standard deviation measured in arbitrary units.

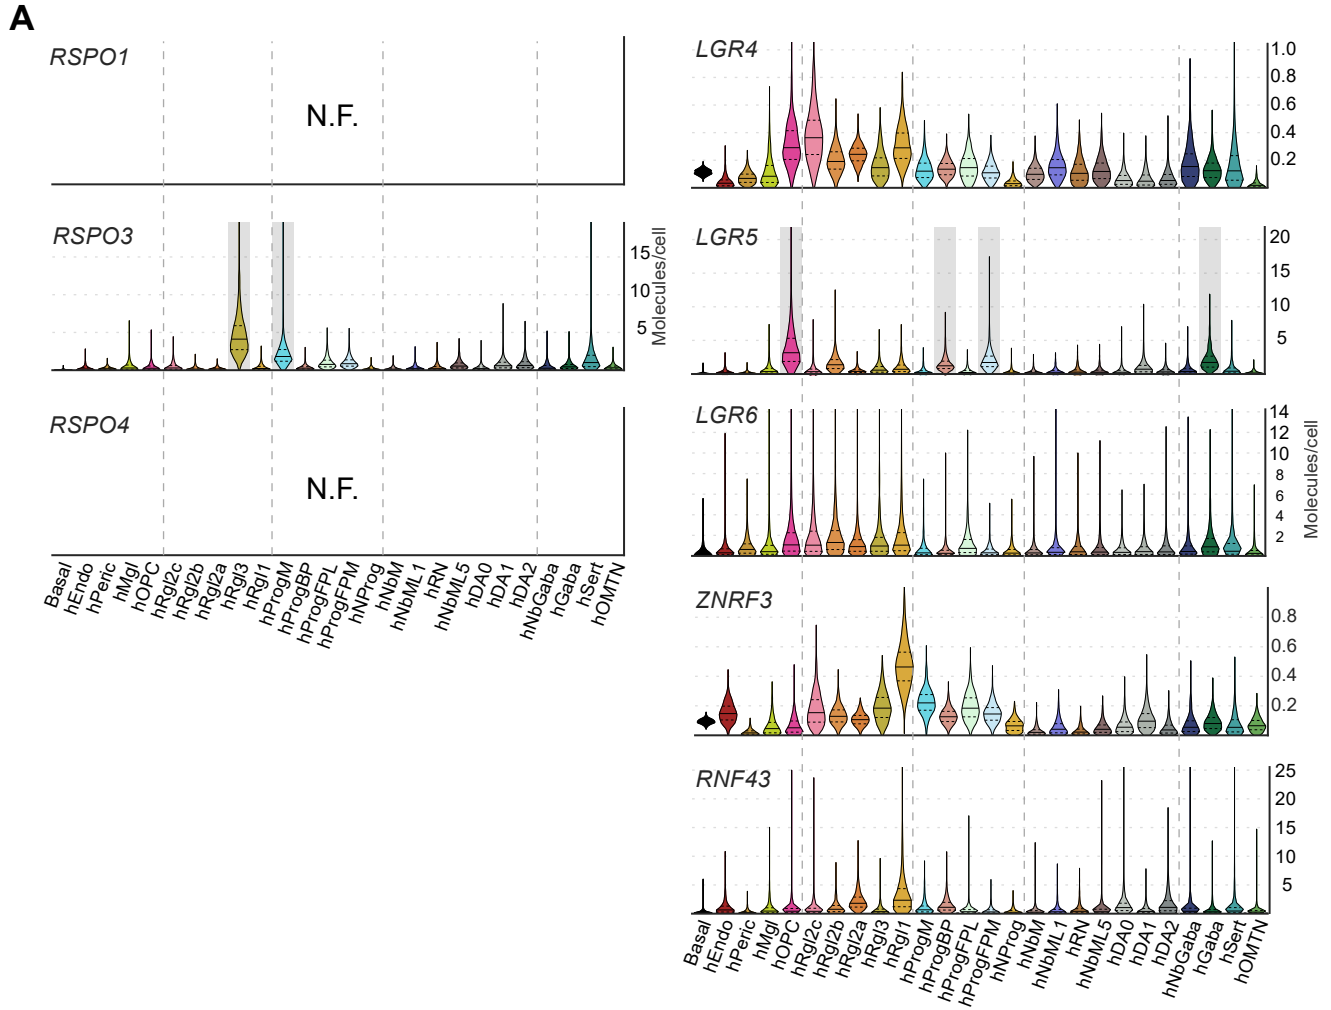

**Figure S4. Single-cell expression of Spondin related genes in the human ventral midbrain. Related to Figure 5.** (A) Violin plots generated from single-cell RNA-seq data of the developing human VM. *RSPO1*, *RSPO3*, *RSPO4*, *LGR4*, *LGR5*, *LGR6*, *ZNRF3*, and *RNF43* expression levels are shown across all known cell types. Right axis shows absolute molecule counts (N.F. = not found). Grey, enriched over baseline with posterior probability >99.8%. For human cell type nomenclature, see La Manno et al., 2016.

| Gene     | Forward               | Reverse                 |
|----------|-----------------------|-------------------------|
| Rspo1    | ggagggagaatgccaaca    | actgatgtgagtggccctgt    |
| Rspo2    | tgaatgccagatggtttgc   | atctgccgtgttctggttc     |
| Rspo3    | agctcctcctctgacagcaa  | ctgtctcgggctcttctctt    |
| Rspo4    | ggagtgccaggaagagtgtg  | ggaccggggttctaggc       |
| Spon1    | actgtgcaacgcaagaagtg  | attctgaccaggctgtccac    |
|          |                       |                         |
| hOtx2    | acaagtggccaattcactcc  | gaggtggacaagggatctga    |
| hEn1     | gagcgcagggcaccacaata  | cgagtcagttttgaccacgg    |
| hPitx3   | ccgtgtcctgcccttatgc   | gggtcccgatagacgtagg     |
| hNr4a2   | gttcagggcagatgggtc    | ctcccgaagagtggtaactgt   |
| hAldh1a1 | gcacgccagacttacctgtc  | cctcctcagttgcaggattaaag |
| hHPRT    | cctggcgtcgtgattagtgat | agacgttcagtcctgtccataa  |
|          |                       |                         |
| mNr4a2   | gcatacaggtccaaccagt   | aatgcaggagaaggcagaaa    |
| mPitx3   | gcaactggccgcccaagg    | aggccccacgttgaccga      |
| mAldh1a1 | gacaggtttccagattggctc | aagactttcccaccattgagtgc |
| mOtx2    | tcgaagagtaagtgccgcc   | ggcaatggttgggactgagg    |
| mEn1     | tctctgggtacctcctgcac  | tccagaaaaggaaggggatt    |
| mLmx1a   | ggaccataagcgacccaaac  | cctgaaccacacggacactc    |
| mGapdh   | tggcctccaaggagtaagaa  | tgtgaggagatgctcagtg     |

**Table S1. Primer Sequences for qPCR. Related to Figure 1, 5, and S3.**
