# Supplementary material for: The Matricellular Protein R-Spondin 2 Promotes Midbrain Dopaminergic Neurogenesis and Differentiation
Source: PubMed Central journal article supplement — Stem Cell Reports. 2018 Aug 23;11(3):651–64. doi: 10.1016/j.stemcr.2018.07.014 (PMC6135723; doi:10.1016/j.stemcr.2018.07.014), 2018-08-23
Supplement: mmc2.pdf [file mmc2.pdf]

# The Matricellular Protein R-Spondin 2 Promotes Midbrain Dopaminergic Neurogenesis and Differentiation

Daniel Gyllborg,<sup>1</sup> Maqsood Ahmed,<sup>2</sup> Enrique M. Toledo,<sup>1,3</sup> Spyridon Theofilopoulos,<sup>1,4</sup> Shanzheng Yang,<sup>1</sup> Charles ffrench-Constant,<sup>2</sup> and Ernest Arenas<sup>1,\*</sup>

<sup>1</sup>Laboratory of Molecular Neurobiology, Department of Medical Biochemistry and Biophysics, Karolinska Institutet, Stockholm 17177, Sweden

<sup>2</sup>MRC Centre of Regenerative Medicine, University of Edinburgh, Edinburgh EH16 4UU, UK

<sup>3</sup>Present address: Novo Nordisk Research Center Oxford, Cellular Systems Genomics, Oxford OX3 7BN, UK

<sup>4</sup>Present address: Institute of Life Science I, Swansea University Medical School, Swansea SA2 8PP, UK

\*Correspondence: [ernest.arenas@ki.se](mailto:ernest.arenas@ki.se)

<https://doi.org/10.1016/j.stemcr.2018.07.014>

## SUMMARY

The development of midbrain dopaminergic (mDA) neurons is controlled by multiple morphogens and transcription factors. However, little is known about the role of extracellular matrix proteins in this process. Here we examined the function of roof plate-specific spondins (RSPO1-4) and the floor plate-specific, spondin 1 (SPON1). Only *RSPO2* and *SPON1* were expressed at high levels during mDA neurogenesis, and the receptor *LGR5* was expressed by midbrain floor plate progenitors. Surprisingly, *RSPO2*, but not *SPON1*, specifically promoted the differentiation of mDA neuroblasts into mDA neurons in mouse primary cultures and embryonic stem cells (ESCs). In addition, *RSPO2* was found to promote not only mDA differentiation, but also mDA neurogenesis in human ESCs. Our results thus uncover an unexpected function of the matricellular protein *RSPO2* and suggest an application to improve mDA neurogenesis and differentiation in human stem cell preparations destined to cell replacement therapy or drug discovery for Parkinson disease.

## INTRODUCTION

The development of ventral midbrain (VM) dopaminergic (DA) neurons involves multiple parallel, controlled processes encompassing many signaling molecules and transcription factors tightly coordinated in order to produce functional midbrain DA (mDA) neurons (reviewed in [Arenas et al., 2015](#)). Wnt signaling has been shown to play many essential functions in VM DA neuron development both *in vivo* and *in vitro*, by activating both Wnt/ $\beta$ -catenin-dependent and/or -independent pathways ([Arenas, 2014](#); [Inestrosa and Arenas, 2010](#)). In brief, Wnt1/ $\beta$ -catenin-dependent signaling in the midbrain is responsible for the specification of the mDA progenitor domain, progenitor proliferation, and survival at late stages ([Castelo-Branco et al., 2003](#); [Prakash et al., 2006](#); [Andersson et al., 2013](#)). Wnt5a/ $\beta$ -catenin-independent signaling is responsible for regulating midbrain morphogenesis, neurogenesis, and mDA precursor differentiation ([Andersson et al., 2008, 2013](#); [Castelo-Branco et al., 2003](#)). Other VM Wnt/ $\beta$ -catenin activators include *Wnt2* responsible for increasing progenitor proliferation ([Sousa et al., 2010](#)) and *Wnt7a* for progenitor proliferation, neurogenesis, and axon morphogenesis ([Fernando et al., 2014](#)). Wnt modulators and inhibitors including *Sfrp1/2* have a role in potentiating the Wnt/PCP signal ([Kele et al., 2012](#)), and Dickkopf members such as *Dkk1* regulate mDA differentiation and morphogenesis ([Ribeiro et al., 2011](#)), while *Dkk3* promotes mDA neuron differentiation ([Fukusumi et al., 2015](#)).

The roof plate-specific spondin (RSPO) family of secreted matricellular Wnt modulator proteins (RSPO1-RSPO4) show ~60% amino acid homology and share similar domain structure ([de Lau et al., 2012](#)). RSPOs contain a thrombospondin type I repeat domain ([Chen et al., 2002](#); [Kazanskaya et al., 2004](#)) that is shared with spondin 1 (SPON1; floor plate spondin), which promotes neural cell adhesion, neurite outgrowth, and nerve precursor differentiation ([Feinstein et al., 1999](#); [Klar et al., 1992](#); [Schubert et al., 2006](#)). RSPOs also contain two furin-like cysteine-rich domains that are necessary to activate the Wnt/ $\beta$ -catenin pathway ([Kim et al., 2008](#)) and to maintain the stem cell compartments in organs such as the intestine, liver, pancreas, kidney, and hair follicle among others ([Barker et al., 2007, 2012](#); [Huch et al., 2013a, 2013b](#); [Jaks et al., 2008](#)).

RSPOs act synergistically to activate Wnt/ $\beta$ -catenin ([Kazanskaya et al., 2004](#); [Kim et al., 2005](#)) by binding to the leucine-rich repeat-containing G protein-coupled receptor 4, 5, or 6 (LGR4-6) instead of the typical WNT receptors, frizzleds (FZDs), or the co-receptor, low-density lipoprotein receptor-related protein 5 or 6 (LRP5/6) ([Carmon et al., 2011](#); [Glinka et al., 2011](#); [de Lau et al., 2011](#)). Upon RSPO binding to LGR, the transmembrane E3 ubiquitin ligases, ring finger protein 43 (RNF43), or the zinc and ring finger 3 (ZNRK3), bind to RSPO ([Chen et al., 2013](#)) and become part of the RSPO-LGR complex ([Hao et al., 2012](#); [Koo et al., 2012](#)). This prevents RNF43 and ZNRK3 from interacting with the WNT-FZD complex and leads to the ubiquitination and degradation of RSPO-LGR instead of the

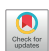

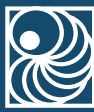

WNT-FZD-LRP signaling complex, thus increasing Wnt/ $\beta$ -catenin signaling (de Lau et al., 2014; Zebisch and Jones, 2015). However, RSPOs have also been reported to inhibit Wnt/ $\beta$ -catenin signaling (Rong et al., 2014) and to activate Wnt/PCP signaling by binding to the heparan-sulfate proteoglycan, syndecan 4 (Ohkawara et al., 2011), suggesting that their activity may be cell context dependent.

*Rspo2* has been shown to play roles in morphogenesis of the respiratory tract as well as limb development (Bell et al., 2008). Within the nervous system, *Rspo2* expression is regulated by the LIM homeodomain transcription factor, *Lmx1a* (Hoekstra et al., 2013), a transcription factor required for the specification of the midbrain floor plate and mDA neuron development (Andersson et al., 2006; Deng et al., 2011). In addition, *miR135a2* has been predicted to target *Rspo2* and *Lmx1b*. While deletion of the *Lmx1b* results in reduced Wnt/ $\beta$ -catenin signaling and the mDA progenitor pool (Anderegg et al., 2013), deletion of *Rspo2* resulted only in a modest decrease in the immunoreactivity of mDA neuron markers, such as TH (tyrosine hydroxylase; the rate-limiting enzyme for dopamine synthesis) and PITX3 (paired-like homeodomain transcription factor 3; a transcriptional regulator of mDA neuron differentiation [Maxwell et al., 2005; Nunes et al., 2003]). It is thus at present unknown whether the development of mDA neurons can be controlled by proteins of the RSPO family or SPON1 and whether they can control stem cell behavior as described in other tissues.

Here we report that *Rspo2*, but not *Rspo1*, 3, 4, or *Spon1*, is dynamically expressed in the VM during the critical time window of mDA neurogenesis. Moreover, analysis of the function of recombinant RSPO2 protein revealed robust positive effects on mDA differentiation that resulted in a 2-fold increase in the number of mDA neurons, not only in primary VM cultures but also in mouse and human embryonic stem cell (ESC) preparations. Thus, our results identify RSPO2 as an efficient factor capable of promoting mDA neuron differentiation in both mouse and human stem cell differentiation protocols. This knowledge can be applied to improve current human ESC-based models and cell replacement strategies for Parkinson disease focusing on the loss of mDA neurons.

## RESULTS

### Expression of Spondins in the Developing Mouse Midbrain Floor Plate

We first determined the expression of all the roof plate family of Spondins, *Rspo1-4*, and the related floor plate *Spon1* (hereafter collectively referred to as spondins) in the developing VM. A clear differential upregulation of the expression of only *Rspo2* was detected by qPCR at embryonic

day 11.5 (E11.5), during mDA neurogenesis and differentiation. All the other spondins either decreased over time or remained relatively constant from E10.5 to E15.5 (Figure 1A). Immunohistochemistry (IHC) showed diffuse expression of RSPO2 in the midbrain floor plate at E11.5, which later concentrated in patches at E12.5 (Figure 1B). TruSeq RNA sequencing (RNA-seq) of the VM between E11.5 and E14.5 (Figure S1A) (Toledo et al., 2017a) confirmed that *Rspo2* is expressed early in mDA development and falls at later stages. This technique also revealed very low expression levels of *Rspo1*, *Rspo3*, and *Rspo4* (less than 1.5 reads per million, Figure S1B). In contrast, *Rspo2* and *Spon1* were expressed at one or two orders of magnitude higher, respectively (Figure 1C). The expression pattern of *Rspos* in the VM were also examined in the Allen Developing Mouse Brain Atlas (Allen Institute for Brain Science, 2017), where we found that *Rspo2* is clearly expressed in mDA progenitors adjacent to mDA neurons, identified by *Th* expression in the marginal zone (Figures 1D and S1C, arrowheads). Lower expression of *Rspo2* was detected at E13.5, while other RSPOs were undetectable in the VM, but present in other structures (Figures S1D and S1E). Notably, *Rspo2* was also detected in a subset of mDA neurons of the *substantia nigra pars compacta* region, at postnatal day 56 (Figure S1F) (Lein et al., 2007). Moreover, analysis of our single-cell RNA-seq dataset of the developing mouse VM from E11.5 to E18.5 (La Manno et al., 2016) revealed that *Rspo2* is significantly expressed in early neural progenitor cells and medial neuroblasts, two cells in the mDA neuron lineage, while *Spon1* was expressed in radial glia-like cells (Figure 1E). Other spondins were either undetected, expressed uniformly or in varying cell types at low copy number (Figure S1G). We thus can conclude that *Spon1* and *Rspo2* are expressed at significant levels in the midbrain floor plate, *Rspo2* being specifically expressed in cells of the mDA lineage and dynamically regulated during mDA neurogenesis.

### Expression of Spondin Receptors in the Developing Mouse Midbrain Floor Plate

The expression of *Lgr4-6* and associated receptors were first examined in bulk RNA-seq data obtained from the developing VM. We found that *Lgr6* is expressed at very low levels and that *Lgr4* and *Lgr5* were not developmentally regulated between E11.5 and E14.5 (Figure S2A). Single-cell RNA-seq analysis revealed significant expression of both receptors in basal plate cells, such as radial glia 2 (*Lgr4* and *Lgr5*) as well as lateral neuroblast 2 and GABA2 neurons (*Lgr4*) (Figure S2B). This result was confirmed by IHC, which revealed the presence of immunoreactive cells in the basal plate (Figure S2C). However, IHC for LGR5 revealed a more dynamic distribution of this protein than expected (Figure 2). At E11, individual LGR5<sup>+</sup> cells sparsely

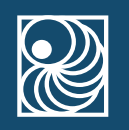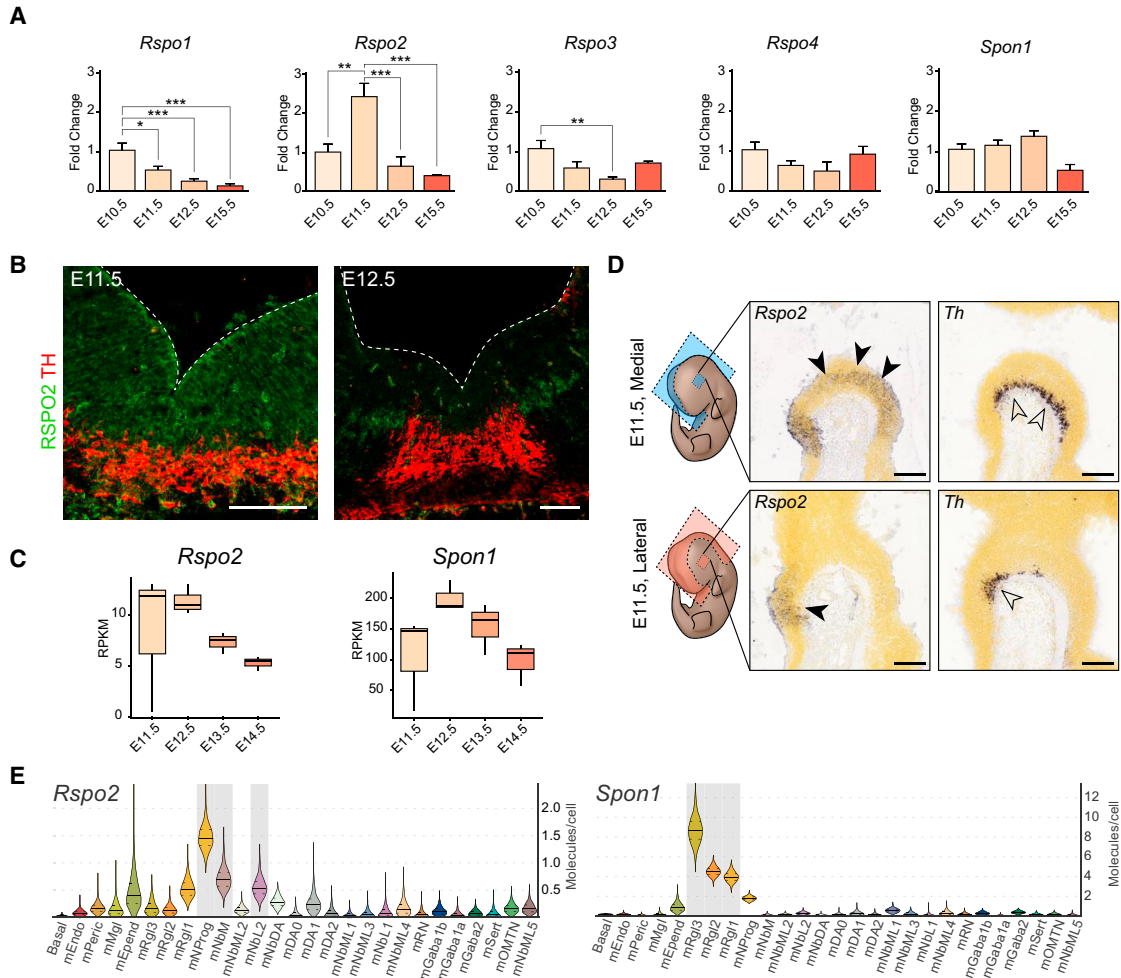

### Figure 1. Expression of Spondins in the Developing Ventral Midbrain

(A) Expression of *Rspo1–4* and *Spon1* measured by qPCR in VM tissue from E10.5 to E15.5. Statistical analysis compared with E11.5 for *Rspo2*, the rest compared with E10.5. \* $p < 0.05$ ; \*\* $p < 0.01$ ; \*\*\* $p < 0.001$  by ANOVA. Data presented as means  $\pm$  SEM measured in a.u., normalized to starting time point, E10.5.

(B) Detection of RSP02 and TH in the VM by IHC, at E11.5 and E12.5. Dashed lines delineate the ventricular cavity. Scale bars, 100  $\mu$ m.

(C) Expression levels of *Rspo2* and *Spon1* by TruSeq RNA-seq analysis of VM tissue obtained from *TH-GFP* mice over time points E11.5 to E14.5 (Toledo et al., 2017a). See also Figure S1A.

(D) E11.5 mouse VM *in situ* hybridization (image data from Allen Institute for Brain Science: Allen Developing Mouse Brain Atlas) for *Rspo2* (solid arrowheads) and *Th* (open arrowheads) as a reference. Sagittal sections through the midline (upper panels) and lateral (lower panels). Scale bars, 200  $\mu$ m.

(E) Violin plots generated from single-cell RNA-seq data of the developing mouse VM. *Rspo2* and *Spon1* expression levels are shown across all known cell types. Right axis shows absolute molecule counts. Gray, enriched over baseline with posterior probability  $>99.8\%$ . Cell types with enriched expression: mNProg, neuronal progenitor; mNbM, neuroblast medial; mNbML2, neuroblast mediolateral 2; mRgl1-3, radial glia-like cells 1-3. For the rest of the nomenclature, see La Manno et al. (2016).

See also Figure S1.

lining the ventricle were detected (Figure 2A, arrowheads). At E11.5, LGR5 IHC was clearly detected in their processes, which co-localized with the radial glia marker Nestin (NES) (Figure 2B), but its expression decreased in cell bodies lining the ventricle (Figure 2B, arrowheads). At E12.5, the levels of LGR5 decreased, resulting in less LRG5<sup>+</sup> radial

glia processes in the basal plate than in the floor plate (Figure 2C), and very few LRG5<sup>+</sup> cell bodies (Figure 2C, arrowhead). Analysis of the expression of the two additional RSP0 receptors, revealed low levels of *Rnf43*, peaking at E11.5–E12.5, and very low or undetectable levels of *Znrf3* by either bulk or single-cell RNA-seq (Figures S2D and

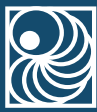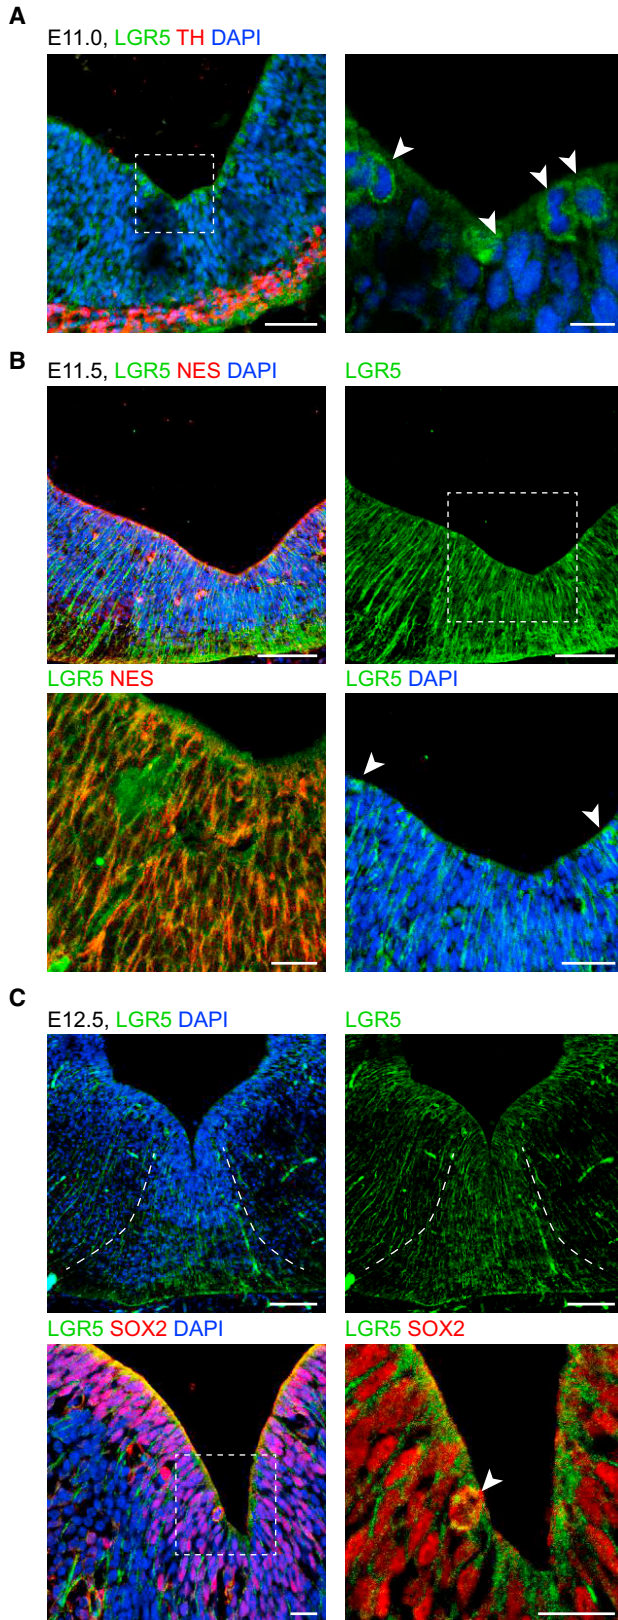

## Figure 2. Identification of LGR5-Positive Cells in Early VM Development

(A) IHC showing LGR5<sup>+</sup> cells lining the ventricle in the VM at E11. Right panel shows a higher magnification of LGR5<sup>+</sup> cells in the left panel, identified with arrowheads. Scale bars, 50  $\mu\text{m}$  (left panel) and 10  $\mu\text{m}$  (right panel).

(B) LGR5 IHC at E11.5 showed less positive cells bodies (arrowheads) and a strong staining radial processes co-stained with Nestin (NES), visible at intermediate (upper right) and higher magnification (lower right). Scale bars, 100 and 20  $\mu\text{m}$  (lower left panel).

(C) LGR5 and SOX2 IHC in the VM at E12.5. Arrowhead shows sporadic double-positive cells in the ventricular zone (VZ), while LGR5 fibers are found to be more restricted to the VM domain. Dashed lines delineate the floor plate. Scale bars, 100  $\mu\text{m}$  (upper panels) and 20  $\mu\text{m}$  (lower panels).

See also [Figure S2](#).

S2E). Receptors of SPON1, APP, and APOER2/LRP8 ([Ho and Südhof, 2004](#); [Hoe et al., 2005](#)) were also expressed, as observed through the RNA-seq data and *in situ* hybridization images ([Figures S2F](#) and [S2G](#)). Thus, our results show that the developing midbrain expresses Spondins receptors, suggesting that the ligands may play a role in development.

## RSPO2, but Not RSPO1 or SPON1, Promotes the Differentiation of Neuroblasts into mDA Neurons

We next examined the function of the two spondins expressed at higher levels during VM development, RSPO2 and SPON1. E11.5 VM primary cultures were treated for 3 days with recombinant RSPO1, RSPO2, or SPON1 ([Figure 3A](#)). We first found that the total number of cells, identified by nuclear DAPI staining, or the total number of neurons in the culture, visualized by immunocytochemistry (ICC) with the pan-neuronal marker  $\beta$ III-tubulin, did not change in the culture ([Figures 3B](#) and [S3A](#)). Accordingly, we did not detect any change in cell death, as assessed by active caspase-3 staining, or in the number of proliferating cells as determined by Ki67 ([Figures 3C](#) and [3D](#), respectively). We next examined whether the proportion of cells in the mDA lineage changed with the treatments. Postmitotic cells in the mDA lineage (neuroblast and neurons), marked by the presence of NR4A2 (nuclear receptor subfamily 4, group A, member 2; also known as Nurr1), showed no significant difference between the treatments ([Figure 3F](#)). However, in cultures treated with recombinant RSPO1 or RSPO2, but not with SPON1, a significant increase in the number of TH<sup>+</sup> mDA neurons was detected ( $\sim 1.75$ - and  $\sim 2.5$ -fold increase, respectively) treatment ([Figures 3G](#) and [3E](#)). We then examined whether this effect was due to an increase in the proportion of postmitotic NR4A2<sup>+</sup> neuroblasts that differentiate into TH<sup>+</sup> mDA neurons and found that this was the case for RSPO2 ([Figure 3H](#)).

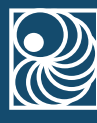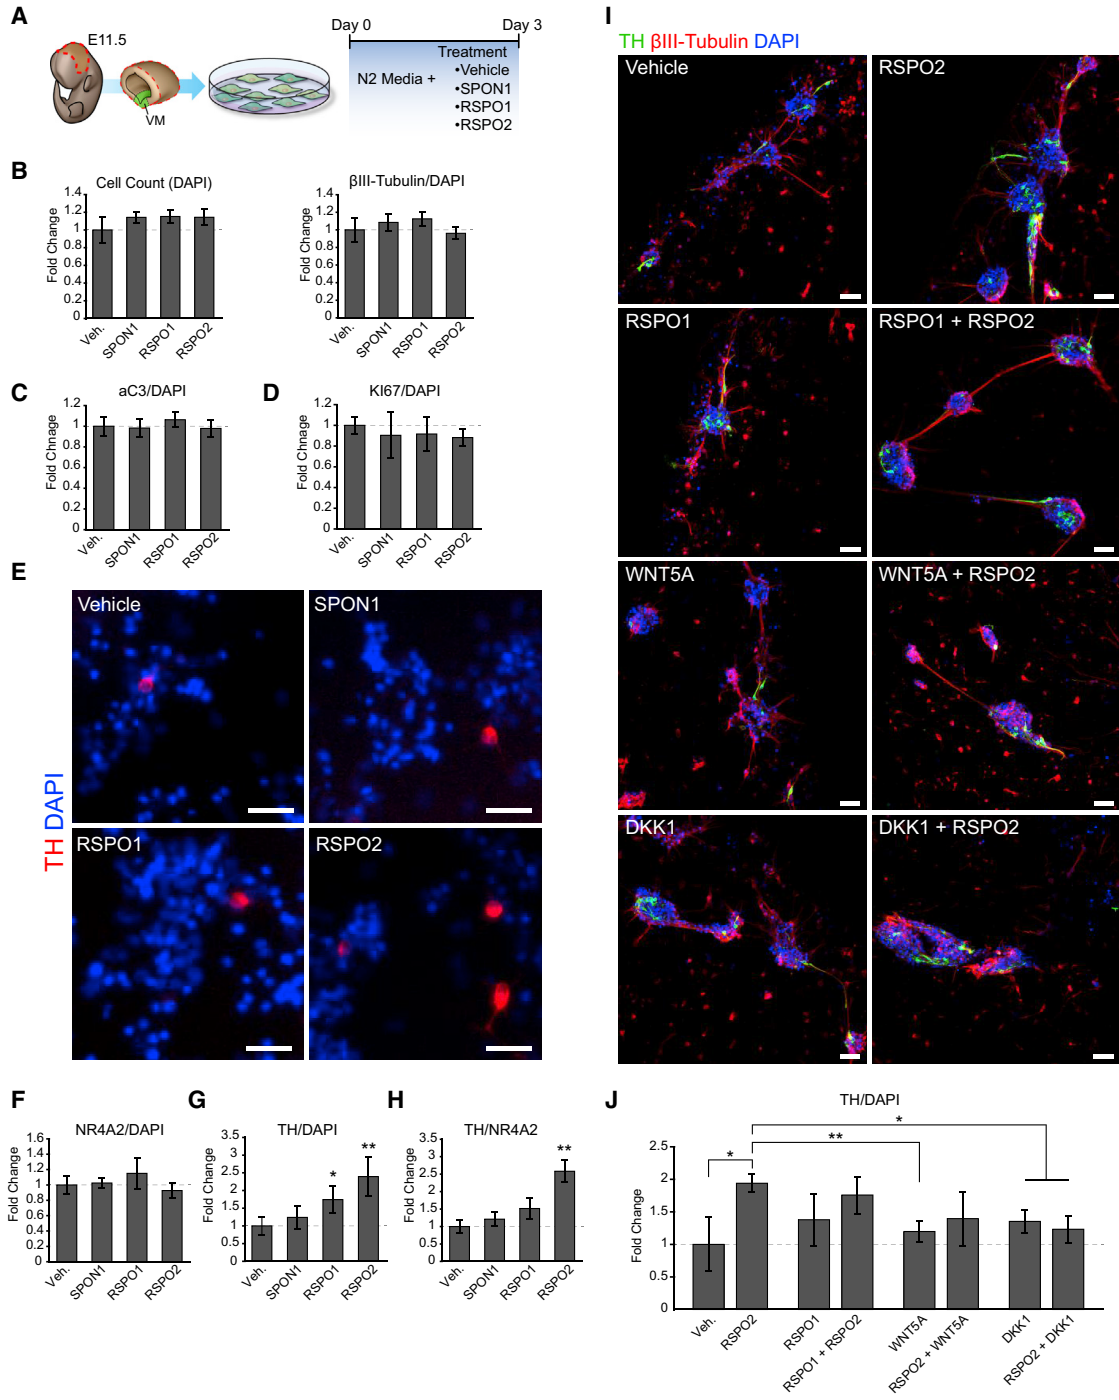

**Figure 3. RSP02 Promotes Midbrain Dopaminergic Neurons Differentiation in Primary Cultures**

- (A) Schematic representation of the mouse primary cell culture protocol.
- (B) Quantification of the total cell numbers (DAPI) and proportion of neurons ( $\beta$ III-tubulin/DAPI) normalized to control (Vehicle).
- (C) Quantification of ongoing cell death, measured by active caspase-3 ICC (aC3<sup>+</sup>/DAPI), showed no difference compared with Vehicle.
- (D) Quantification of KI67 ICC (KI67<sup>+</sup>/DAPI) showed no difference compared with Vehicle.
- (E) ICC staining showing and increase in TH<sup>+</sup> neurons compared with DAPI after RSP02 treatment, but not RSP01 or SPON1. Scale bars, 50  $\mu$ m.
- (F) Quantification of postmitotic cells in the DA lineage, measured by NR4A2 ICC, showed no difference compared with Vehicle.

(legend continued on next page)

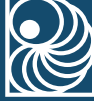

We also performed expression analysis of DA genes by qPCR in RSPO2-treated cultures (Figure S3B) and found a significant increase in *Aldh1a1* expression, a marker for the *substantia nigra pars compacta* and VTA type 2 cell types (La Manno et al., 2016), but no changes in *Otx2*, *Lmx1a*, *Nr4a2*, *En1*, or *Pitx3*, suggesting a very specific role of RSPO2 in late differentiation. Combined, our results indicate that RSPO2 is the only spondin capable of promoting the development of mDA neurons, and that it does so by promoting the differentiation of NR4A2<sup>+</sup> neuroblasts into a subset of TH<sup>+</sup> mDA neurons.

We also examined whether the activity of RSPO2 in primary cultures could be potentiated or inhibited by co-treatment with RSPO1 or modulators of Wnt signaling. Surprisingly we found that RSPO1 reduced the increase in the number of TH<sup>+</sup> neurons by RSPO2 (Figures 3I and 3J), indicating that RSPO1 and RSPO2 have clearly distinct activities. Moreover, we found that co-treatment of primary cultures with either WNT5A or Dkk1, both of which inhibit Wnt/ $\beta$ -catenin signaling in the VM (for review see Arenas, 2014), reduced the effects of RSPO2 on the number of TH<sup>+</sup> cells (Figures 3I and 3J). This result suggests that the effect of RSPO2 on mDA neurons involves, at least partially, the activation of Wnt/ $\beta$ -catenin signaling.

To rule out an early effect of spondins on mDA progenitors, we examined earlier stages of mDA neuron development in mouse ESCs. We used a 14-day differentiation protocol and treated the cultures with either SPON1 or RSPO2 between day 5 and 11 (Figure 4A). However, neither SPON1 nor RSPO2 showed any significant effect on cell proliferation or cell death as shown by active caspase-3 and Ki67 immunostainings (Figures 4B and 4C). Similar to the primary cultures, the number of postmitotic NR4A2<sup>+</sup> neuroblasts did not change by SPON1 or RSPO2 treatment (Figure 4D), and a significant 1.8-fold increase in TH<sup>+</sup> neurons was detected (Figures 4E and 4F). Although, SPON1 induced a significant 30% decrease in the number of TH<sup>+</sup> cells (Figures 4E and 4F). Analysis of the proportion of TH<sup>+</sup> neurons being generated from NR4A2<sup>+</sup> neuroblasts in differentiated mouse ESCs also revealed a modest decrease in DA differentiation by SPON1 and a clear increase by RSPO2 (Figure 4G). These results thus confirm the specific role of RSPO2 in promoting the late differentiation of mDA neuroblasts into neurons in the developing mouse VM.

### RSPO2 Promotes the Differentiation of Human ESCs into DA Neurons and mDA neurogenesis

We next examined whether the function of RSPO2 is conserved in human DA neuron development and whether RSPO2 could be used to improve the differentiation of human ESCs into mDA neurons. We first investigated the expression of *RSPO2* and *SPON1* in our single-cell RNA-seq dataset from human VM development (La Manno et al., 2016). Interestingly, we found higher levels of expression of *RSPO2* and *SPON1* in the human VM compared with mouse and significant differences in the cell types expressing them. While *RSPO2* is exclusively expressed in radial glia type 1 (hRgl1), *SPON1* is exclusively expressed in radial glia type 3 (hRgl3, Figure 5A). Analysis of the expression of the *Rspo* receptors by single-cell RNA-seq revealed very low levels of *LGR4-6*, *RNF43*, and *ZNRF3* (mean molecules/cell) and higher levels of *LGR5* in different cells, including a floor plate progenitor (hProgFPM, Figure S4A), a cell type thought to give rise to mDA neurons (La Manno et al., 2016). We thus decided to examine the possible role of RSPO2 on mDA neuron development in human ESC cultures.

Human ESCs were differentiated for 28 days as described recently (Nolbrant et al., 2017), using a protocol that includes the use of GSK3 $\beta$  inhibitors to enhance the induction of human midbrain floor plate (for review see Arenas et al., 2015). Human ESCs were treated with recombinant RSPO2 from day 14 to 28 (Figure 5B) and characterized by ICC and qPCR with various mDA markers (Figures 5C and 5D). While no change was detected for *OTX2*, *NR4A2*, or *EN1*, we observed a significant increase in *PITX3* and *ALDH1A1* expression. We also found that the levels of *ALDH1A1* protein increased by RSPO2 treatment, complementing thus the previous finding of decreased levels in *Rspo2*<sup>-/-</sup> mice (Hoekstra et al., 2013). Also, in line with both our primary and mouse ESC cultures, we found that RSPO2 induced no significant differences in the total number of cells (DAPI), cell death (active caspase-3), or proliferation (Ki67) in the human ESC cultures (Figures 5E–5G). Notably, quantification of the number of postmitotic cells in the DA lineage revealed no significant difference in the number of NR4A2<sup>+</sup> cells (Figures 5E and 5H), but a significant  $\approx$ 1.8-fold increase in the number of TH<sup>+</sup> neurons treated with RSPO2 (Figures 5E and 5I). A significant  $\approx$ 1.2-fold increase in the proportion of NR4A2<sup>+</sup> cells that became TH<sup>+</sup> was detected (Figure 5J),

(G) Bar plots showing that RSPO2 treatment increases the total number of TH<sup>+</sup> cells (TH/DAPI), compared with control (Vehicle).

(H) Normalized ratio of TH<sup>+</sup> cells/NR4A2<sup>+</sup> cells revealed an increase in the proportion of postmitotic dopaminergic cells (NR4A2<sup>+</sup>) becoming mDA neurons (TH<sup>+</sup>).

(I) ICC staining of cells treated with various Wnt signaling pathway modifiers, stained with TH and  $\beta$ III-tubulin. Scale bars, 50  $\mu$ m.

(J) Quantification of TH<sup>+</sup> cells in various treatments from (I) as compared with Vehicle.

All data normalized to control (Vehicle) presented as means  $\pm$  SEM.  $n = 3$ ,  $t$  test; \* $p < 0.05$ , \*\* $p < 0.01$ . See also Figure S3.

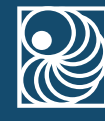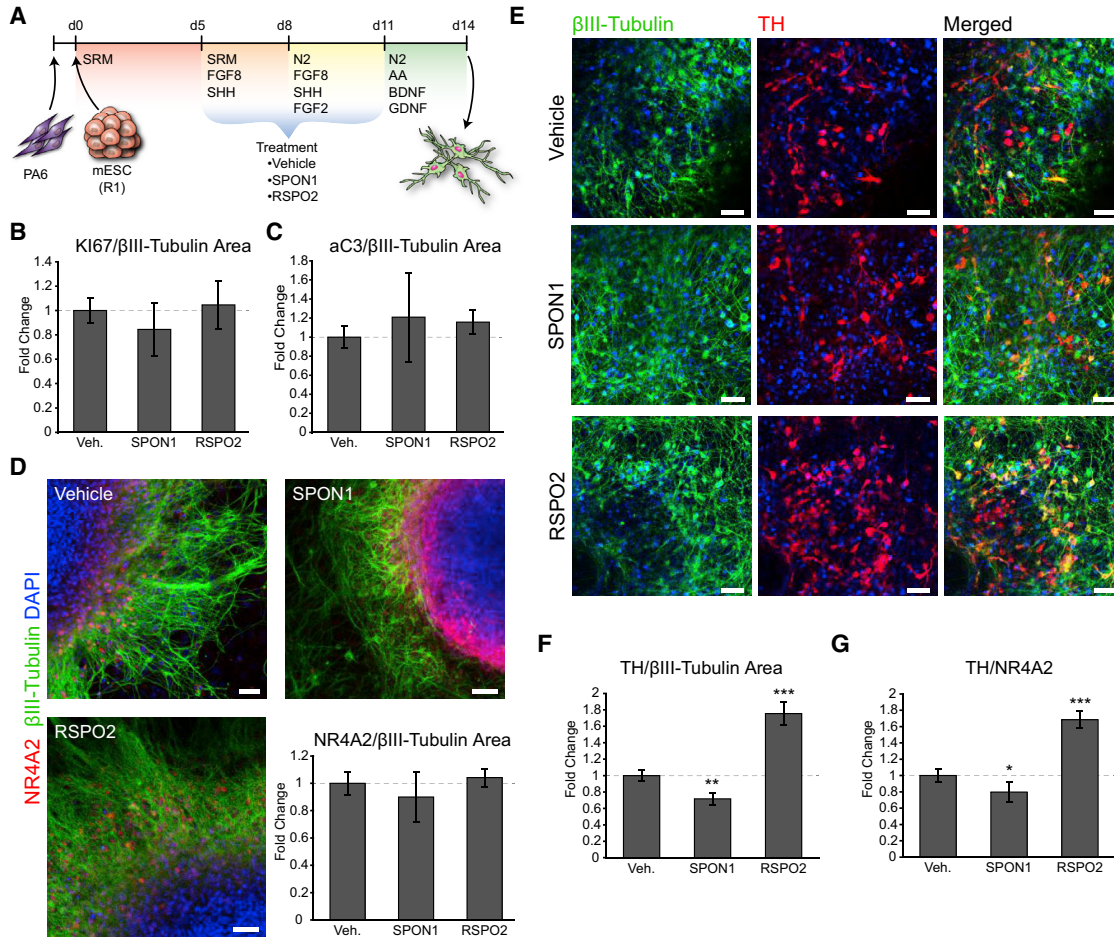

#### Figure 4. RSP02 Promotes the Dopaminergic Differentiation of Mouse ESCs

(A) Cartoon showing the protocol for the differentiation of mouse ESCs into mDA neurons and the time line (d, days) of spondin treatment, between days 5 and 11.

(B) Quantification of proliferation (KI67) in areas undergoing neurogenesis ( $\beta$ III-tubulin<sup>+</sup>) as assessed by ICC, normalized to control.

(C) Quantification of ongoing cell death by active caspase-3 (aC3) ICC in  $\beta$ III-tubulin<sup>+</sup> areas.

(D) ICC for NR4A2 and  $\beta$ III-tubulin after 14 days *in vitro* and bar plots showing no difference in the number of NR4A2<sup>+</sup> cells per  $\beta$ III-tubulin area. Scale bars, 50  $\mu$ m.

(E) ICC staining for TH and  $\beta$ III-tubulin after 14 days *in vitro* in vehicle-, SPON1-, and RSP02-treated cultures. Scale bars, 50  $\mu$ m.

(F) The number of TH<sup>+</sup> cells per  $\beta$ III-tubulin area by ICC, normalized to control, increased by RSP02 treatment and decreased by SPON1.

(G) The proportion of NR4A2<sup>+</sup> cells that become TH<sup>+</sup> increased by RSP02 treatment and decreased by SPON1.

All data normalized to control (Vehicle) presented as means  $\pm$  SEM. n = 3, t test; \*p < 0.05, \*\*p < 0.01, \*\*\*p < 0.001.

suggesting that RSP02 also promotes the differentiation of neuroblasts into mDA neurons. However, this increase was not sufficient to explain the  $\approx$ 1.8-fold increase in TH<sup>+</sup> cells, and suggested the involvement of an additional upstream mechanism. To mark proliferating progenitors, we performed a 5-ethynyl-2'-deoxyuridine (EdU) pulse-chase experiment and examined whether they undergo neurogenesis as identified by the presence of cells double-positive for EdU and TH. Our results show that RSP02 induced a significant increase in the EdU<sup>+</sup> cells that undergo neurogenesis and become TH<sup>+</sup> (Figures 5K and 5L). Thus, our

data indicate that RSP02, in addition of promoting the differentiation of neuroblasts into mDA neurons in mouse and human, it promotes mDA neurogenesis in human ESC cultures.

## DISCUSSION

In this study we examine the expression and function of the extracellular matrix (ECM) proteins of the RSP0 family and of SPON1, in the mouse and human VM and ESCs. Our

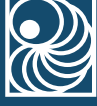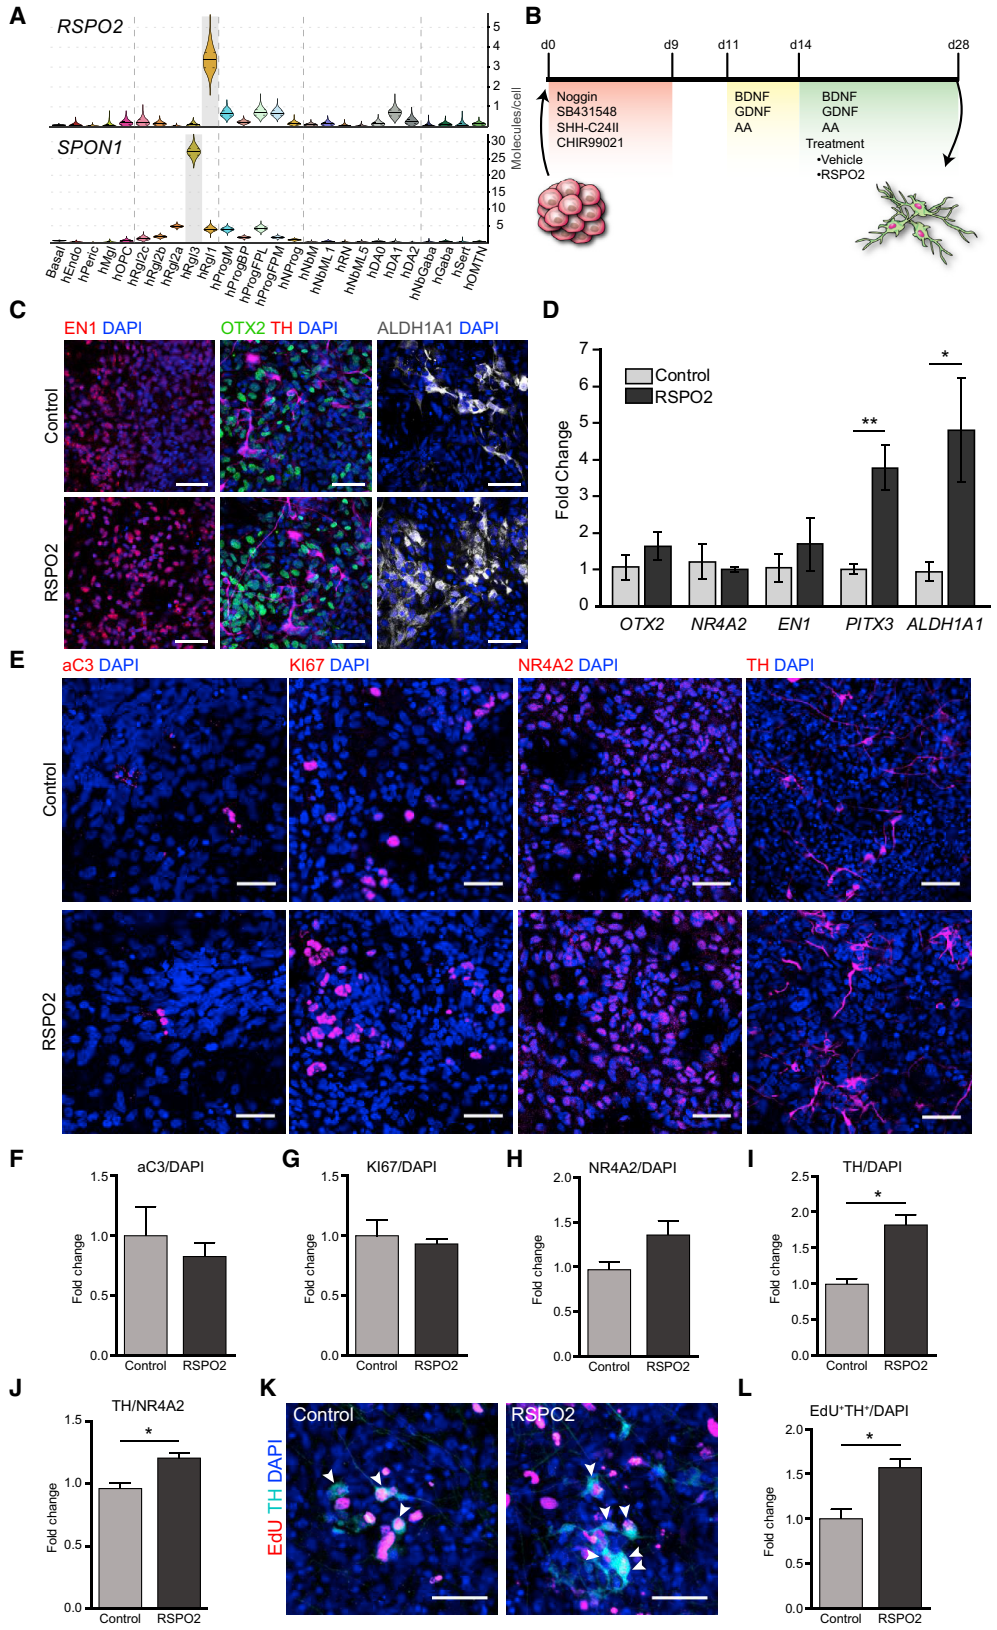

(legend on next page)



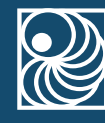

analysis revealed that *RSPO2*, *SPON1*, and *LGR5* are the most significantly expressed spondins and receptors in the VM in both the developing mouse and human VM. However, we identified substantial differences in the cell types expressing spondins. In the mouse, *Rspo2* was found in neuronal progenitors and neuroblasts and *Spon1* in radial glia 1–3; whereas, in the human VM, *RSPO2* and *SPON1* were exclusively expressed in radial glia 1 and 3, respectively. An additional difference between the two species was that human *RSPO2* was expressed in earlier cell types (hRgl1), compared with mouse *Rspo2*, which was expressed in a rapid amplifying type of progenitor (mNProg) and the medial postmitotic neuroblast (mNbM) (La Manno et al., 2016). In agreement with this, we found an earlier function of *RSPO2* to promote mDA neurogenesis in human ESCs and a shared late function of *RSPO2* in mouse and human, to promote the differentiation of postmitotic neuroblasts into mDA neurons. Unlike other systems in which *RSPO2* control stem cell or progenitor maintenance (de Lau et al., 2014) and *SPON1* regulates differentiation (Schubert et al., 2006), we did not observe any effect of *RSPO2* on the number of Ki67<sup>+</sup> cells or the total number of EdU<sup>+</sup> cells in human ESC cultures, or of *SPON1* to promote differentiation. This is not totally surprising as the midbrain floor plate expresses genes otherwise present in completely different compartments (i.e., roof plate genes, such as *Lmx1a*, *Msx1*, *Wnt1*, and *Rspo2*, together with floor plate genes such as *Shh*, *Foxa2*, *Wnt5a*, and *Spon1*), resulting in different regulatory networks and functions compared with other brain regions or structures. One such example is the presence of neurogenesis in the midbrain floor plate,

which represents an exception to the entire neural tube. Notably our results indicate that roof plate *RSPO2*, as other “roof plate factors” in the VM (i.e., *Lmx1a*, *Msx1*, and *Wnt1*; see Arenas et al., 2015 for review) also regulates mDA neurogenesis.

Understanding human mDA neuron development *in vivo* and implementing such knowledge to protocols for the differentiation of human ESCs into mDA neurons is currently considered as the basis for refining and improving existing protocols to prepare cells for cell replacement therapy. In the past, the implementation of correct levels of Wnt signaling for the specification of midbrain floor plate progenitors has been critical for the development of protocols allowing the transplantation of mDA progenitors capable of efficiently differentiating into functional mDA neurons *in vivo* (Kriks et al., 2011; Nolbrant et al., 2017). These protocols are still susceptible to improvement by implementing new factors and knowledge, such as additional components of the Wnt signaling pathway recently reported in the developing mouse and human VM (Toledo et al., 2017b) or the Wnt modulator that we hereby report, *RSPO2*. As an ECM protein, *RSPO2* may function to define, together with other ECM proteins, the niche where human mDA neurogenesis takes place. Indeed, our results indicate that by manipulating the extracellular compartment it is possible to control essential intracellular functions such as mDA neurogenesis and differentiation in human ESC cultures. Moreover, *RSPO2* may also play a role in mDA neuron subtype specification, as suggested by the increase in *ALDH1A1* in mouse and human cell expression by *RSPO2* treatment (our results) or the decrease in its protein

### Figure 5. Role of *RSPO2* in Differentiation of Human ESCs

(A) Violin plots generated from single-cell RNA-seq data of the developing human VM. *RSPO2* and *SPON1* expression levels are shown across all cell types in the human VM. Right axis shows absolute molecule counts. Gray, enriched over baseline with posterior probability >99.8%. Cell types with enriched expression: hRgl1,3, radial glia-like cells 1,3. For the rest of the cell-type nomenclature, see La Manno et al. (2016).

(B) Protocol for the dopaminergic differentiation of human ESCs.

(C) Human ESC cultures after 28 days stained for various DA lineage markers: EN1, OTX2, TH, and ALDH1A1. Scale bars, 50  $\mu$ m.

(D) Expression of DA markers (*OTX2*, *NR4A2*, *EN1*, *PITX3*, and *ALDH1A1*) by qPCR between Vehicle- and *RSPO2*-treated cultures after 28 days (unpaired t test, n = 3, \*p < 0.05, \*\*p < 0.01).

(E) Human ESC cultures after 28 days stained for markers of apoptosis (aC3), proliferation (KI67), markers of DA lineage (*NR4A2* and TH). Scale bars, 50  $\mu$ m.

(F) The number of apoptotic cells (aC3<sup>+</sup>/DAPI) was not modified by *RSPO2* treatment.

(G) The number of proliferating cells (KI67<sup>+</sup>/DAPI) was the same in both conditions.

(H) The number of NR4A2<sup>+</sup> cells were not significantly different in *RSPO2*-treated and control cultures (t test, n = 3, p = 0.09).

(I) A significant increase in the total number of DA neurons (TH<sup>+</sup>/DAPI) was detected in *RSPO2*-treated human ESC cultures (t test, n = 3, \*p = 0.01).

(J) *RSPO2* treatment increases the proportion of NR4A2<sup>+</sup> cells that become TH<sup>+</sup> in human ESC cultures (t test, n = 3, \*p = 0.02).

(K) *RSPO2* increases DA neurogenesis in human ESC cultures, as assessed by the incorporation of EdU in TH<sup>+</sup> cells at day 28, arrowheads. Scale bars, 50  $\mu$ m.

(L) Quantification of the number of EdU/TH double-positive cells showed that *RSPO2* significantly increases DA neurogenesis in human ESC cultures (t test, n = 3, \*p = 0.03).

See also Figure S4.



levels in  $RSPO2^{-/-}$  mice (Hoekstra et al., 2013). While much attention has been devoted to the role of transcription factors and morphogens in development and stem cell biology, only recently have we started to implement the knowledge of what can be considered as the third pillar of development: the ECM. Indeed, ECM proteins are gaining increasing interest as the accrued knowledge of their diversity (reviewed in Murphy-Ullrich and Sage, 2014) and functions begin to accumulate (Ganapathy et al., 2016; Long et al., 2016; Wiese and Faissner, 2015). In this context, our study identifies  $RSPO2$  as a matricellular component capable of promoting mDA neurogenesis and differentiation. Our results thus pave the way for  $RSPO2$  to be used to improve current human ESC preparations for regenerative medicine or drug discovery for Parkinson disease.

## EXPERIMENTAL PROCEDURES

### Animals

Wild-type (WT) CD-1 (Charles River, Germany) or WT Swiss (Janvier Labs) mice were mated overnight, and the noon of the day of a plug was considered E0.5. Mice were shipped as pregnant females, and then housed and treated in accordance with the guidelines of the local ethics committee (Stockholm's Norra Djurförsöksetisks Nämnd. Ethical numbers N145/09, N273/11, N326/12, and N158/15).

### Tissue Collection

After CD-1 mice were killed and embryos collected at different stages, embryonic heads were fixed in 4% paraformaldehyde (PFA) for at least 6 hr at +4°C. Then tissue was washed briefly in PBS and processed to 30% sucrose/PBS solution overnight at +4°C. Tissue was then embedded in O.C.T. (TissueTek) and stored at -80°C until sectioning. Sectioning was performed on a Leica cryostat at 16  $\mu$ m sections used for IHC analysis.

### qPCR

#### Mice

RNA was isolated from dissected WT CD-1 mice VM from various time points. RNA was extracted using RNeasy Mini Kit (QIAGEN). SYBR green real-time qPCR assay was performed as described previously (Rawal et al., 2006; Sacchetti et al., 2009).

#### Mouse Primary Culture

Total RNA was isolated using RNeasy Kit (QIAGEN), and cDNA was made with cDNA SuperScript II Reverse Transcriptase Kit (Thermo Fisher Scientific). Specific genes were amplified using Fast SYBR Green Master Mix Kit (Thermo Fisher Scientific). Real-time PCR was performed using fast protocols on a 7500 Fast Real-Time PCR system (Thermo Fisher Scientific). GAPDH was used to normalize the expression of mRNA.

#### Human ESC Culture

Total RNA was extracted from cells at day 28 of culture using the NucleoSpin RNA extraction kit (Macherey-Nagel, cat. no. 740955.10) as per the manufacturer's instructions. Quantity and

quality of RNA was determined using a NanoDrop Lite Spectrophotometer (Thermo Fisher Scientific). cDNA was synthesized from 500 ng of RNA using SuperScript II Reverse Transcriptase (Invitrogen). SYBR green (QIAGEN) qPCR assays were performed using a LightCycler 480II (Roche) and primers purchased from Sigma (sequences in table). A 5-fold serial dilution standard curve was generated for each primer to generate efficiency curves and relative expression levels were obtained using the Pfaffl method (Pfaffl, 2001). HPRT was used as the housekeeping gene.

Primer sequences in Table S1.

### RNA-Seq Datasets and Gene Expression Profiles

Gene expression data were obtained through previous datasets. For tissue TruSeq datasets, see Toledo et al. (2017a), and for single-cell RNA-seq datasets see La Manno et al. (2016).

### Primary Cell Culture

Plates were coated with poly-D-lysine and VMs were dissected out from E11.5 WT embryos into ice-cold PBS. VMs were dissociated by trituration using flame-polished glass Pasteur pipettes. Cells were plated at a density of 150,000 cells/cm<sup>2</sup>. They were grown in N2 medium (1:1 F12:MEM, HEPES, N2 supplement, and glutamine; Thermo Fisher Scientific) with additional 6 mg/mL glucose and 3 mg/mL AlbuMAXI BSA. Cells were treated with for 3 days with different recombinant proteins (recombinant human F-spondin protein 80 ng/mL [cat. no. 3135-SP], recombinant human R-spondin 2 protein 160 ng/mL [cat. no. 3266-RS], recombinant mouse R-spondin 1 protein 160 ng/mL [cat. no. 3474-RS], recombinant mouse Dkk-1 protein 100 ng/mL [cat. no. 5897-DK], and recombinant human/mouse Wnt-5a protein 100 ng/mL [cat. no. 645-WN], all resuspended in 0.1% BSA/PBS; R&D Systems) or vehicle (0.1% BSA/PBS). Cells were then fixed with 4% PFA and processed for staining.

### Mouse ESC Culture

Mouse ESC (R1) cultures were co-cultured with immortalized PA6 feeder cells. Differentiation of mouse ESCs was done following a 14-day *in vitro* protocol (Barberi et al., 2003). Mouse ESCs were maintained in proliferation medium (Knockout-DMEM, 15% Knockout Serum Replacement, 2 mM L-glutamine, 10,000 U/mL penicillin/streptomycin [all from Life Technologies], 1% non-essential amino acids [VWR], 0.1 mM  $\beta$ -mercaptoethanol [Sigma], and 1,000 U/mL leukemia inhibitory factor [LIF] [ESGRO; Chemicon/Millipore]). Mouse ESCs were plated (150 cells/cm<sup>2</sup>) on a confluent mitomycin C-treated PA6 feeder cell layer in 24-well plates in proliferation medium without LIF. At day 5, sonic hedgehog (SHH) (200 ng/mL) and fibroblast growth factor 8 (FGF8) (25–100 ng/mL) were added to the medium. After 8 days, N2 medium was used in the presence of SHH, FGF8, and basic FGF (10 ng/mL). From day 11 to 14, N2 medium containing ascorbic acid (AA) (200  $\mu$ M) (Sigma), brain-derived neurotrophic factor (BDNF) (20 ng/mL) (R&D Systems), and glial cell line-derived neurotrophic factor (GDNF) (10 ng/mL) (R&D Systems) was used. Treatments with recombinant spondins or vehicle started at day 5 and lasted up until day 11, concentrations the same as primary cultures. Cells were then fixed with 4% PFA and processed for staining.

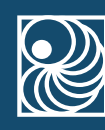

## Human ESC Culture

Undifferentiated RC17 ESCs (passages 33–54, Roslin Cells, hPSC reg. no. RCe021-A) were maintained in E8 medium (A1517001) on Geltrex (1%, 12760021)-coated plates and passaged weekly with EDTA (0.5 mM). To start differentiation (day 0), human ESC colonies were detached using EDTA (0.5 mM) and placed in non-treated 60-mm culture dishes in differentiation medium consisting of DMEM:F12/Neurobasal (1:1), N2 supplement (1:100), B27 supplement (1:50), SB431542 (10  $\mu$ M, Tocris Biosciences), rhnoggin (100 ng/mL, R&D Systems), SHH-C24H (200 ng/mL, R&D Systems), and CHIR99021 (0.9  $\mu$ M, Tocris Biosciences). Medium was changed once on day 2. The resultant embryoid bodies were collected on day 4 and placed on polyornithine (PO)-, fibronectin (Fn)-, and laminin (Lm)-coated plates in reduced N2 (1:200) and B27 (1:100) condition. Growth and patterning factors were removed on day 9 with the cultures kept in DMEM:F12/Neurobasal (1:1), N2 supplement (1:200), and B27 supplement (1:100). On day 11 of differentiation, the cell clusters were dissociated to single cells with accutase and replated onto dry PO/Fn/Lm-coated plates in Neurobasal, B27 (1:50), BDNF (20 ng/mL), GDNF (10 ng/mL), AA (200  $\mu$ M), and db-cAMP (0.5 mM, Sigma). From day 14, cultures were treated with RSPO2 (1  $\mu$ g/mL, R&D Systems) up until day 28, when they were fixed in 3.7% PFA for 30 min. EdU pulse was administered on day 23 for 24 hr to capture all the dividing cells. Cells were then fixed 4 days later on day 28. All culture reagents are from Invitrogen unless otherwise stated here or previously.

## IHC/ICC

Cells and tissue were fixed in 4% PFA, washed in PBS and blocked in PBTA (PBS, 5% normal goat/donkey serum [Jackson ImmunoResearch], 0.1% Triton X-100, and 1% BSA) for 1 hr at room temperature (RT). Primary antibodies were diluted in 0.1% Triton X-100 and 1% BSA/PBS, and incubations were carried out overnight at 4°C.

Antibodies used were:  $\beta$ III-tubulin (1:1,000, Promega, G7121), cleaved caspase-3 (1:200, Cell Signaling Technology, 9661S), NR4A2 (1:100, Santa Cruz, sc-991), TH (1:1,000, Millipore, AB152), TH (1:1,000, Pel-Freez, P40101), NES (1:500, BD Biosciences, 556309), LGR5 (1:200, Atlas Antibodies, HPA012530), LGR4 (1:50, Santa Cruz Biotechnology, sc-292344), RSPO2 (1:500, Atlas Antibodies, HPA025764), SOX2 (1:200, R&D Systems, MAB2018), Ki67 (1:200, Thermo Fisher Scientific, MA5-14520), EN1 (Abcam, ab70993), OTX2 (R&D Systems, AF1979), ALDH1A1 (Abcam, ab23375), and click-iT EdU (Invitrogen, C10337). Corresponding secondary antibodies were Alexa Fluor Dyes (Invitrogen) (1:1,000) and incubated at RT for 1 hr. Cells were counterstained with DAPI (Thermo Fisher Scientific, D1306) or Hoechst 33258 (Sigma). Cells were then washed and kept in PBS and sections were washed and mounted with Mounting Medium (Dako).

IHC/ICC were captured on an Olympus FV1000 confocal microscope, a Zeiss LSM510 confocal microscope, or a Zeiss Axioplan microscope. Human ESC images were captured on either an operetta high-content imaging system (PerkinElmer) or an SP8 confocal microscope (Leica). Human ESCs were counted using an automated software package (Columbus). Images and figure layouts were processed in FIJI (Schindelin et al., 2012), Adobe Photoshop, and Adobe Illustrator.

## Cell Counts and Statistical Analyses

All experiments were performed as technical duplicates (two wells per treatment) and three independent biological replicates. Analysis of images was performed from at least five images of each well. For mouse ESC cultures, cells were counted within a  $\beta$ III-tubulin area (defined as an area just outside of cell clusters where nuclei could be distinguished) with the aid of FIJI image processing software (Schindelin et al., 2012). Statistical test performed include two-tailed t test and/or ANOVA, deviations are SDs unless otherwise stated.

## ACCESSION NUMBERS

The NCBI GEO accession numbers for the TruSeq RNA-seq raw data reported in this paper is GEO: GSE82099 for E12.5, and GSE117394 for E11.5/13.5/14.5 time points.

## SUPPLEMENTAL INFORMATION

Supplemental Information includes four figures and one table and can be found with this article online at <https://doi.org/10.1016/j.stemcr.2018.07.014>.

## AUTHOR CONTRIBUTIONS

D.G. performed most of the mouse experiments, analysis, and wrote the manuscript. M.A. performed the human ESC cultures and analysis. E.M.T. provided the bioinformatical analysis. S.T. and S.Y. contributed to some of the mouse experiments. C. ffrench-Constant and E.A. supervised and aided in the experimental design, conclusions, and writing of the manuscript. All authors reviewed the manuscript.

## ACKNOWLEDGMENTS

We thank Linda Adlerz for her support with the qPCR experiments, members of the Arenas lab for their help and suggestions, and Alessandra Nanni for technical and secretarial assistance. Financial support was obtained from Swedish Research Council (VR projects: DBRM, 2011-3116, 2011-3318, and 2016-01526), Swedish Foundation for Strategic Research (SRL and SB16-0065), European Commission (NeuroStemCellRepair and DDPD-Genes), Karolinska Institutet, Hjärnfonden (FO2015:0202, FO2017:0059), Cancerfonden (CAN 2016/572), and SFO Strat Regen (SG-2018) to E.A. E.M.T. received a fellowship from VR. M.A. and C. ffrench-Constant were supported by NeuroStemCellRepair and Wellcome Trust Senior Investigator Award.

Received: December 6, 2017

Revised: July 28, 2018

Accepted: July 29, 2018

Published: August 23, 2018

## REFERENCES

- Allen Institute for Brain Science. (2017). Allen developing mouse brain atlas. Website: <http://developingmouse.brain-map.org>.  
 Anderegg, A., Lin, H.-P., Chen, J.-A., Caronia-Brown, G., Cherepanova, N., Yun, B., Joksimovic, M., Rock, J., Harfe, B.D., Johnson, R.,



- et al. (2013). An Lmx1b-miR135a2 regulatory circuit modulates Wnt1/Wnt signaling and determines the size of the midbrain dopaminergic progenitor pool. *PLoS Genet.* 9, e1003973.
- Andersson, E., Tryggvason, U., Deng, Q., Friling, S., Alekseenko, Z., Robert, B., Perlmann, T., and Ericson, J. (2006). Identification of intrinsic determinants of midbrain dopamine neurons. *Cell* 124, 393–405.
- Andersson, E.R., Prakash, N., Cajanek, L., Minina, E., Bryja, V., Bryjova, L., Yamaguchi, T.P., Hall, A.C., Wurst, W., and Arenas, E. (2008). Wnt5a regulates ventral midbrain morphogenesis and the development of A9-A10 dopaminergic cells in vivo. *PLoS One* 3, e3517.
- Andersson, E.R., Saltó, C., Villaescusa, J.C., Cajanek, L., Yang, S., Bryjova, L., Nagy, I.I., Vainio, S.J., Ramirez, C., Bryja, V., et al. (2013). Wnt5a cooperates with canonical Wnts to generate midbrain dopaminergic neurons in vivo and in stem cells. *Proc. Natl. Acad. Sci. USA* 110, E602–E610.
- Arenas, E. (2014). Wnt signaling in midbrain dopaminergic neuron development and regenerative medicine for Parkinson's disease. *J. Mol. Cell Biol.* 6, 42–53.
- Arenas, E., Denham, M., and Villaescusa, J.C. (2015). How to make a midbrain dopaminergic neuron. *Development* 142, 1918–1936.
- Barberi, T., Klivenyi, P., Calingasan, N.Y., Lee, H., Kawamata, H., Loonam, K., Perrier, A.L., Bruses, J., Rubio, M.E., Topf, N., et al. (2003). Neural subtype specification of fertilization and nuclear transfer embryonic stem cells and application in parkinsonian mice. *Nat. Biotechnol.* 21, 1200–1207.
- Barker, N., van Es, J.H., Kuipers, J., Kujala, P., van den Born, M., Cozijnsen, M., Haegebarth, A., Korving, J., Begthel, H., Peters, P.J., et al. (2007). Identification of stem cells in small intestine and colon by marker gene Lgr5. *Nature* 449, 1003–1007.
- Barker, N., Rookmaaker, M.B., Kujala, P., Ng, A., Leushacke, M., Snippert, H., van de Wetering, M., Tan, S., Van Es, J.H., Huch, M., et al. (2012). Lgr5(+ve) stem/progenitor cells contribute to nephron formation during kidney development. *Cell Rep.* 2, 540–552.
- Bell, S.M., Schreiner, C.M., Wert, S.E., Mucenski, M.L., Scott, W.J., and Whitsett, J.A. (2008). R-spondin 2 is required for normal laryngeal-tracheal, lung and limb morphogenesis. *Development* 135, 1049–1058.
- Carmon, K.S., Gong, X., Lin, Q., Thomas, A., and Liu, Q. (2011). R-spondins function as ligands of the orphan receptors LGR4 and LGR5 to regulate Wnt/beta-catenin signaling. *Proc. Natl. Acad. Sci. USA* 108, 11452–11457.
- Castelo-Branco, G., Wagner, J., Rodriguez, F.J., Kele, J., Sousa, K., Rawal, N., Pasolli, H.A., Fuchs, E., Kitajewski, J., and Arenas, E. (2003). Differential regulation of midbrain dopaminergic neuron development by Wnt-1, Wnt-3a, and Wnt-5a. *Proc. Natl. Acad. Sci. USA* 100, 12747–12752.
- Chen, J.-Z., Wang, S., Tang, R., Yang, Q.-S., Zhao, E., Chao, Y., Ying, K., Xie, Y., and Mao, Y.-M. (2002). Cloning and identification of a cDNA that encodes a novel human protein with thrombospondin type I repeat domain, hPWTSR. *Mol. Biol. Rep.* 29, 287–292.
- Chen, P.-H., Chen, X., Lin, Z., Fang, D., and He, X. (2013). The structural basis of R-spondin recognition by LGR5 and RNF43. *Genes Dev.* 27, 1345–1350.
- Deng, Q., Andersson, E., Hedlund, E., Alekseenko, Z., Coppola, E., Panman, L., Millonig, J.H., Brunet, J.-F., Ericson, J., and Perlmann, T. (2011). Specific and integrated roles of Lmx1a, Lmx1b and Phox2a in ventral midbrain development. *Development* 138, 3399–3408.
- Feinstein, Y., Borrell, V., Garcia, C., Burstyn-Cohen, T., Tzarfaty, V., Frumkin, A., Nose, A., Okamoto, H., Higashijima, S., Soriano, E., et al. (1999). F-spondin and mindin: two structurally and functionally related genes expressed in the hippocampus that promote outgrowth of embryonic hippocampal neurons. *Development* 126, 3637–3648.
- Fernando, C.V., Kele, J., Bye, C.R., Niclis, J.C., Alsanie, W., Blakely, B.D., Stenman, J., Turner, B.J., and Parish, C.L. (2014). Diverse roles for Wnt7a in ventral midbrain neurogenesis and dopaminergic axon morphogenesis. *Stem Cells Dev.* 23, 1991–2003.
- Fukumami, Y., Meier, F., Götz, S., Matheus, F., Irmeler, M., Beckervordersandforth, R., Faus-Kessler, T., Minina, E., Rauser, B., Zhang, J., et al. (2015). Dickkopf 3 promotes the differentiation of a rostralateral midbrain dopaminergic neuronal subset in vivo and from pluripotent stem cells in vitro in the mouse. *J. Neurosci.* 35, 13385–13401.
- Ganapathy, K., Sowmithra, S., Bhonde, R., and Datta, I. (2016). By changing dimensionality, sequential culturing of midbrain cells, rather than two-dimensional culture, generates a neuron-glia ratio closer to in vivo adult midbrain. *Cells Tissues Organs* 201, 445–463.
- Glinka, A., Dolde, C., Kirsch, N., Huang, Y.-L., Kazanskaya, O., Ingelfinger, D., Boutros, M., Cruciat, C.-M., and Niehrs, C. (2011). LGR4 and LGR5 are R-spondin receptors mediating Wnt/beta-catenin and Wnt/PCP signalling. *EMBO Rep.* 12, 1055–1061.
- Hao, H.-X., Xie, Y., Zhang, Y., Charlat, O., Oster, E., Avello, M., Lei, H., Mickanin, C., Liu, D., Ruffner, H., et al. (2012). ZNRF3 promotes Wnt receptor turnover in an R-spondin-sensitive manner. *Nature* 485, 195–200.
- Ho, A., and Südhof, T.C. (2004). Binding of F-spondin to amyloid-beta precursor protein: a candidate amyloid-beta precursor protein ligand that modulates amyloid-beta precursor protein cleavage. *Proc. Natl. Acad. Sci. USA* 101, 2548–2553.
- Hoe, H., Wessner, D., Beffert, U., Becker, A.G., Matsuoka, Y., and Rebeck, G.W. (2005). F-spondin interaction with the apolipoprotein E receptor ApoEr2 affects processing of amyloid precursor protein. *Mol. Cell. Biol.* 25, 9259–9268.
- Hoekstra, E.J., von Oerthel, L., van der Heide, L.P., Kouwenhoven, W.M., Veenvliet, J.V., Wever, I., Jin, Y.-R., Yoon, J.K., van der Linden, A.J.A., Holstege, F.C.P., et al. (2013). Lmx1a encodes a rostral set of mesodiencephalic dopaminergic neurons marked by the Wnt/B-catenin signaling activator R-spondin 2. *PLoS One* 8, e74049.
- Huch, M., Dorrell, C., Boj, S.F., van Es, J.H., Li, V.S.W., van de Wetering, M., Sato, T., Hamer, K., Sasaki, N., Finegold, M.J.,



- et al. (2013a). In vitro expansion of single Lgr5(+) liver stem cells induced by Wnt-driven regeneration. *Nature* **494**, 5–10.
- Huch, M., Bonfanti, P., Boj, S.F., Sato, T., Loomans, C.J.M., van de Wetering, M., Sojoodi, M., Li, V.S.W., Schuijers, J., Gracanin, A., et al. (2013b). Unlimited in vitro expansion of adult bi-potent pancreas progenitors through the Lgr5/R-spondin axis. *EMBO J.* **32**, 2708–2721.
- Inestrosa, N.C., and Arenas, E. (2010). Emerging roles of Wnts in the adult nervous system. *Nat. Rev. Neurosci.* **11**, 77–86.
- Jaks, V., Barker, N., Kasper, M., van Es, J.H., Snippert, H.J., Clevers, H., and Toftgård, R. (2008). Lgr5 marks cycling, yet long-lived, hair follicle stem cells. *Nat. Genet.* **40**, 1291–1299.
- Kazanskaya, O., Glinka, A., del Barco Barrantes, I., Stannek, P., Niehrs, C., and Wu, W. (2004). R-Spondin2 is a secreted activator of Wnt/beta-catenin signaling and is required for *Xenopus myogenesis*. *Dev. Cell* **7**, 525–534.
- Kele, J., Andersson, E.R., Villaescusa, J.C., Cajanek, L., Parish, C.L., Bonilla, S., Toledo, E.M., Bryja, V., Rubin, J.S., Shimono, A., et al. (2012). SFRP1 and SFRP2 dose-dependently regulate midbrain dopamine neuron development in vivo and in embryonic stem cells. *Stem Cells* **30**, 865–875.
- Kim, K.-A., Kakitani, M., Zhao, J., Oshima, T., Tang, T., Binnerts, M., Liu, Y., Boyle, B., Park, E., Emtage, P., et al. (2005). Mitogenic influence of human R-spondin1 on the intestinal epithelium. *Science* **309**, 1256–1259.
- Kim, K., Wagle, M., Tran, K., Zhan, X., Dixon, M.A., Liu, S., Gros, D., Korver, W., Yonkovich, S., Tomasevic, N., et al. (2008). R-spondin family members regulate the Wnt pathway by a common mechanism. *Mol. Biol. Cell* **19**, 2588–2596.
- Klar, A., Baldassare, M., and Jessell, T.M. (1992). F-spondin: a gene expressed at high levels in the floor plate encodes a secreted protein that promotes neural cell adhesion and neurite extension. *Cell* **69**, 95–110.
- Koo, B.-K., Spit, M., Jordens, I., Low, T.Y., Stange, D.E., van de Wetering, M., van Es, J.H., Mohammed, S., Heck, A.J.R., Maurice, M.M., et al. (2012). Tumour suppressor RNF43 is a stem-cell E3 ligase that induces endocytosis of Wnt receptors. *Nature* **488**, 665–669.
- Kriks, S., Shim, J.-W., Piao, J., Ganat, Y.M., Wakeman, D.R., Xie, Z., Carrillo-Reid, L., Auyeung, G., Antonacci, C., Buch, A., et al. (2011). Dopamine neurons derived from human ES cells efficiently engraft in animal models of Parkinson's disease. *Nature* **480**, 547–551.
- de Lau, W., Barker, N., Low, T.Y., Koo, B.-K., Li, V.S.W., Teunissen, H., Kujala, P., Haegerbarth, A., Peters, P.J., van de Wetering, M., et al. (2011). Lgr5 homologues associate with Wnt receptors and mediate R-spondin signalling. *Nature* **476**, 293–297.
- de Lau, W.B.M., Snel, B., and Clevers, H.C. (2012). The R-spondin protein family. *Genome Biol.* **13**, 242.
- de Lau, W., Peng, W.C., Gros, P., and Clevers, H. (2014). The R-spondin/Lgr5/Rnf43 module: regulator of Wnt signal strength. *Genes Dev.* **28**, 305–316.
- Lein, E.S., Hawrylycz, M.J., Ao, N., Ayres, M., Bensinger, A., Bernard, A., Boe, A.F., Boguski, M.S., Brockway, K.S., Byrnes, E.J., et al. (2007). Genome-wide atlas of gene expression in the adult mouse brain. *Nature* **445**, 168–176.
- Long, K., Moss, L., Laursen, L., Boulter, L., and Ffrench-Constant, C. (2016). Integrin signalling regulates the expansion of neuroepithelial progenitors and neurogenesis via Wnt7a and Decorin. *Nat. Commun.* **7**, 10354.
- La Manno, G., Gyllborg, D., Codeluppi, S., Nishimura, K., Salto, C., Zeisel, A., Borm, L.E., Stott, S.R.W., Toledo, E.M., Villaescusa, J.C., et al. (2016). Molecular diversity of midbrain development in mouse, human, and stem cells. *Cell* **167**, 566–580.e19.
- Maxwell, S.L., Ho, H.-Y., Kuehner, E., Zhao, S., and Li, M. (2005). Pitx3 regulates tyrosine hydroxylase expression in the substantia nigra and identifies a subgroup of mesencephalic dopaminergic progenitor neurons during mouse development. *Dev. Biol.* **282**, 467–479.
- Murphy-Ullrich, J.E., and Sage, E.H. (2014). Revisiting the matrix-cellular concept. *Matrix Biol.* **37**, 1–14.
- Nolbrant, S., Heuer, A., Parmar, M., and Kirkeby, A. (2017). Generation of high-purity human ventral midbrain dopaminergic progenitors for in vitro maturation and intracerebral transplantation. *Nat. Protoc.* **12**, 1962–1979.
- Nunes, I., Tovmasian, L.T., Silva, R.M., Burke, R.E., and Goff, S.P. (2003). Pitx3 is required for development of substantia nigra dopaminergic neurons. *Proc. Natl. Acad. Sci. USA* **100**, 4245–4250.
- Ohkawara, B., Glinka, A., and Niehrs, C. (2011). Rspo3 binds syndecan 4 and induces Wnt/PCP signaling via clathrin-mediated endocytosis to promote morphogenesis. *Dev. Cell* **20**, 303–314.
- Pfaffl, M.W. (2001). A new mathematical model for relative quantification in real-time RT-PCR. *Nucleic Acids Res.* **29**, e45.
- Prakash, N., Brodski, C., Naserke, T., Puelles, E., Gogoi, R., Hall, A., Panhuysen, M., Echevarria, D., Sussel, L., Weisenhorn, D.M.V., et al. (2006). A Wnt1-regulated genetic network controls the identity and fate of midbrain-dopaminergic progenitors in vivo. *Development* **133**, 89–98.
- Rawal, N., Castelo-Branco, G., Sousa, K.M., Kele, J., Kobayashi, K., Okano, H., and Arenas, E. (2006). Dynamic temporal and cell type-specific expression of Wnt signaling components in the developing midbrain. *Exp. Cell Res.* **312**, 1626–1636.
- Ribeiro, D., Ellwanger, K., Glasgow, D., Theofilopoulos, S., Corsini, N.S., Martin-Villalba, A., Niehrs, C., and Arenas, E. (2011). Dkk1 regulates ventral midbrain dopaminergic differentiation and morphogenesis. *PLoS One* **6**, e15786.
- Rong, X., Chen, C., Zhou, P., Zhou, Y., Li, Y., Lu, L., Liu, Y., Zhou, J., and Duan, C. (2014). R-spondin 3 regulates dorsoventral and anteroposterior patterning by antagonizing Wnt/ $\beta$ -catenin signaling in zebrafish embryos. *PLoS One* **9**, e99514.
- Sacchetti, P., Sousa, K.M., Hall, A.C., Liste, I., Steffensen, K.R., Theofilopoulos, S., Parish, C.L., Hazenberg, C., Richter, L.A., Hovatta, O., et al. (2009). Liver X receptors and oxysterols promote ventral midbrain neurogenesis in vivo and in human embryonic stem cells. *Cell Stem Cell* **5**, 409–419.
- Schindelin, J., Arganda-Carreras, I., Frise, E., Kaynig, V., Longair, M., Pietzsch, T., Preibisch, S., Rueden, C., Saalfeld, S., Schmid, B.,

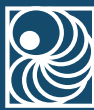

- et al. (2012). Fiji: an open-source platform for biological-image analysis. *Nat. Methods* *9*, 676–682.
- Schubert, D., Klar, A., Park, M., Dargusch, R., and Fischer, W.H. (2006). F-spondin promotes nerve precursor differentiation. *J. Neurochem.* *96*, 444–453.
- Sousa, K.M., Villaescusa, J.C., Cajanek, L., Ondr, J.K., Castelo-Branco, G., Hofstra, W., Bryja, V., Palmberg, C., Bergman, T., Wainwright, B., et al. (2010). Wnt2 regulates progenitor proliferation in the developing ventral midbrain. *J. Biol. Chem.* *285*, 7246–7253.
- Toledo, E.M., Manno, G.L., Rivetti, P., Gyllborg, D., Villaescusa, C., Linnarsson, S., and Arenas, E. (2017a). Molecular analysis of the midbrain dopaminergic niche during neurogenesis. *bioRxiv* <https://doi.org/10.1101/155846>.
- Toledo, E.M., Gyllborg, D., and Arenas, E. (2017b). Translation of WNT developmental programs into stem cell replacement strategies for the treatment of Parkinson's disease. *Br. J. Pharmacol.* *174*, 4716–4724.
- Wiese, S., and Faissner, A. (2015). The role of extracellular matrix in spinal cord development. *Exp. Neurol.* *274*, 90–99.
- Zebisch, M., and Jones, E.Y. (2015). Crystal structure of R-spondin 2 in complex with the ectodomains of its receptors LGR5 and ZNRF3. *J. Struct. Biol.* *191*, 149–155.

**Stem Cell Reports, Volume 11**

**Supplemental Information**

**The Matricellular Protein R-Spondin 2 Promotes Midbrain Dopaminergic Neurogenesis and Differentiation**

**Daniel Gyllborg, Maqsood Ahmed, Enrique M. Toledo, Spyridon Theofilopoulos, Shanzheng Yang, Charles French-Constant, and Ernest Arenas**

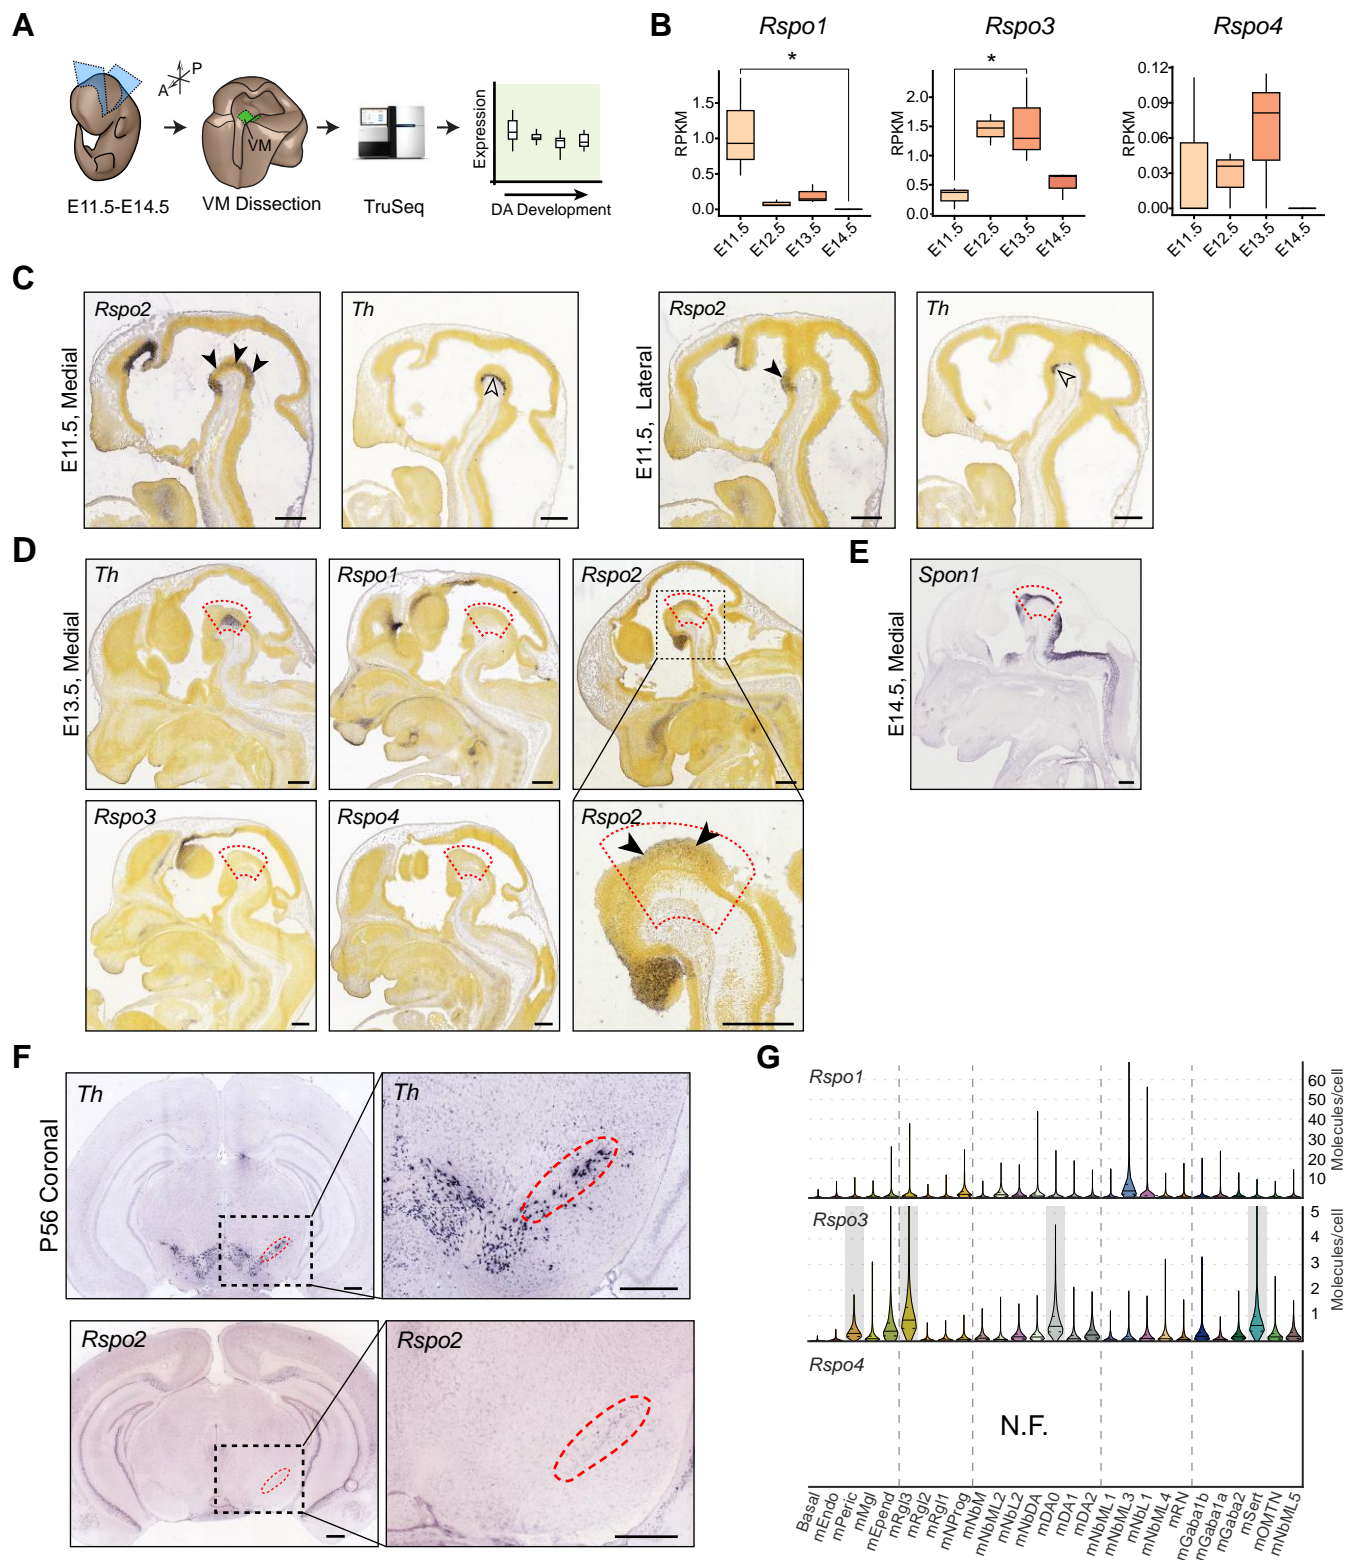

**Figure S1. Expression of Spondins in ventral midbrain development. Related to Figure 1.**

(A) Scheme of TruSeq experiment, VM region dissected from *TH-GFP* mice followed by Illumina sequencing.

(B) Expression levels of *Rspo1*, *Rspo3* and *Rspo4* by TruSeq RNA-seq analysis of VM tissue obtained from *TH-GFP* mice over time points E11.5 to E14.5 (Toledo et al., 2017a).

(C) Lower magnification of Figure 1D of E11.5 mouse VM ISH (image data from Allen Institute for Brain Science: Allen Developing Mouse Brain Atlas) for *Rspo2* (solid arrowheads) and *Th* (open arrowheads). Sagittal sections. Scale bar, 500  $\mu$ m.

(D) E13.5 mouse head ISH (image data from Allen Institute for Brain Science: Allen Developing Mouse Brain Atlas) for *Th* (VM outlined in red) and *Rspo(1-4)* at E13.5. Sagittal sections through the midline and lateral. Scale bars, 500  $\mu$ m.

(E) E14.5 mouse head ISH (image data from GenePaint, Set ID:EB2268) for *Spon1*. VM outlined in red. Sagittal section through midline. Scale bar, 500  $\mu$ m.

(F) P56 mouse brain ISH (image data from Allen Institute for Brain Science: Allen Mouse Brain Atlas) for *Th* and *Rspo2*. SNc outlined in red. Coronal sections. Scale bars, 500  $\mu$ m.

(G) Violin plots generated from single-cell RNA-seq data of the developing mouse VM. *Rspo1*, *Rspo3* and *Rspo4* expression levels are shown across all known cell types. Right axis shows absolute molecule counts (N.F. = not found). Grey, enriched over baseline with posterior probability >99.8%. For cell type nomenclature, see La Manno et al., 2016.



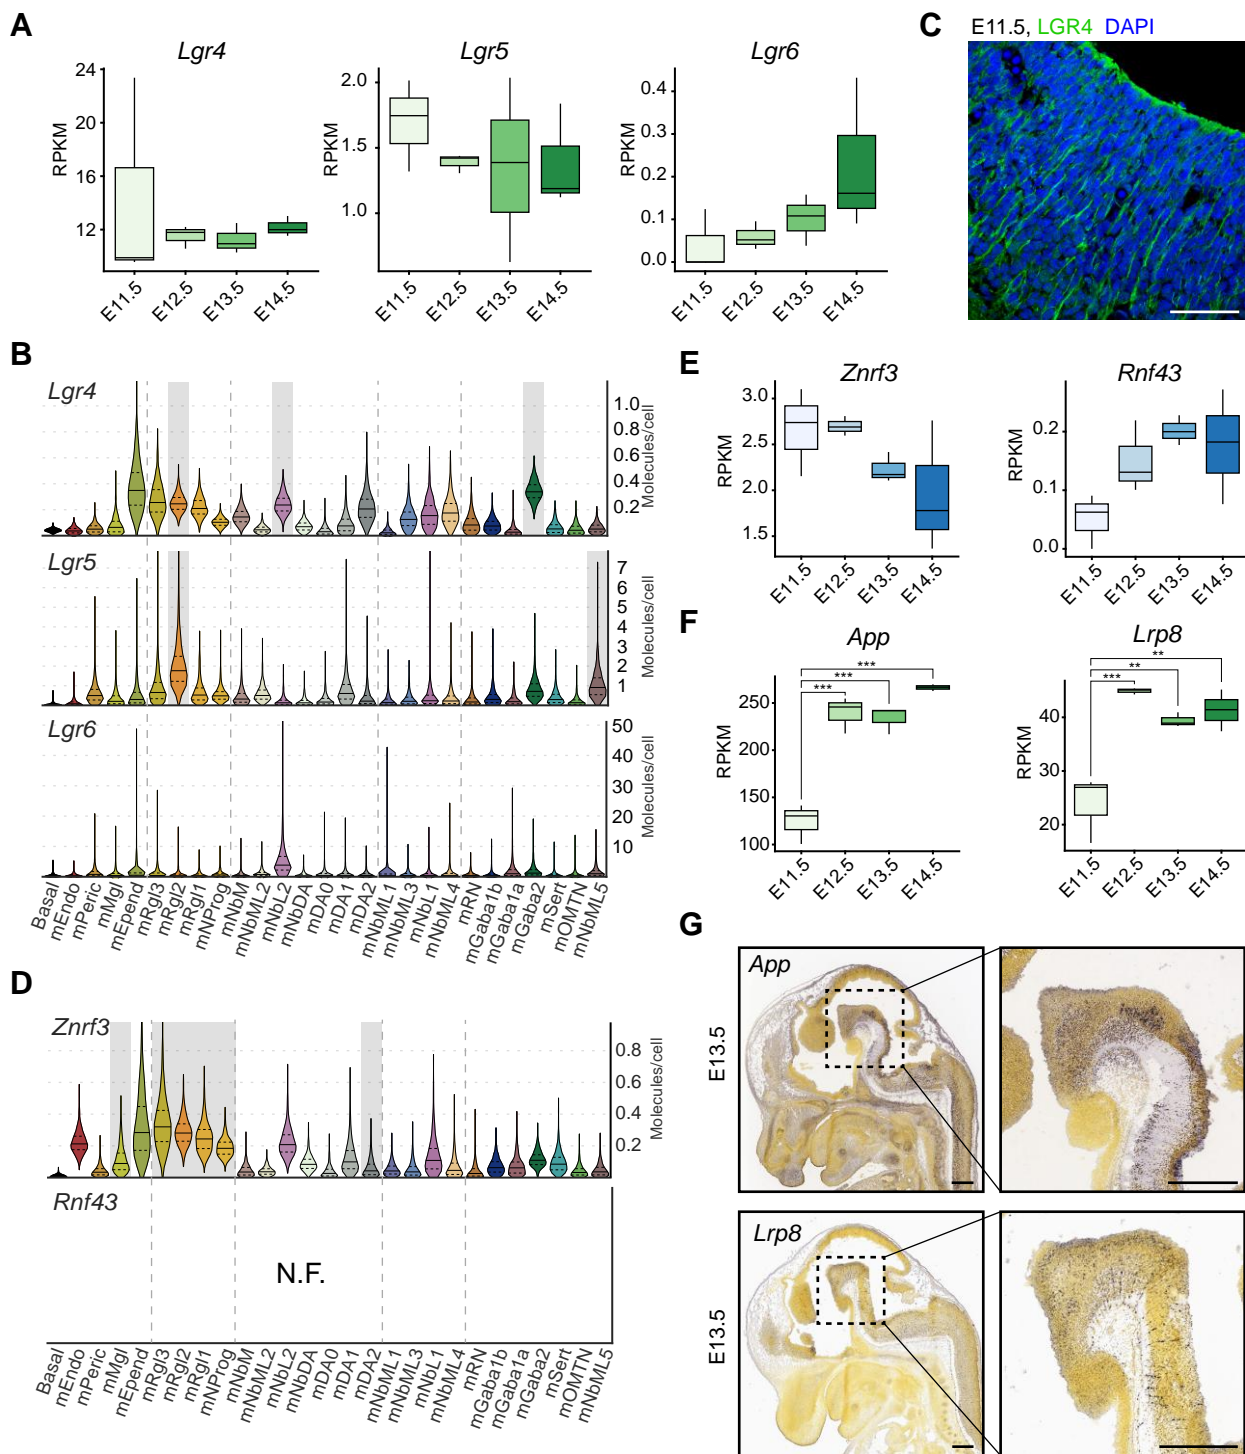

**Figure S2. Expression patterns of Spondin-associated receptors. Related to Figure 2.**

(A) Expression levels of *Lgr4*, *Lgr5*, and *Lgr6* by TruSeq RNA-seq analysis of VM tissue obtained from *TH-GFP* mice over timepoints E11.5 to E14.5 (Toledo et al., 2017a).

(B) Violin plots generated from single-cell RNA-seq data of the developing mouse VM. *Lgr4*, *Lgr5*, and *Lgr6* expression levels are shown across all known cell types. Right axis shows absolute molecule counts. Grey, enriched over baseline with posterior probability >99.8%. For cell type nomenclature, see La Manno et al., 2016.

(C) Detection of LGR4 in the midbrain by IHC, at E11.5. Scale bar, 50  $\mu$ m.

(D) Violin plots generated from single-cell RNA-seq data of the developing mouse VM. *Znr3* and *Rnf43* expression levels are shown across all known cell types. Right axis shows absolute molecule counts (N.F. = not found). Grey, enriched over baseline with posterior probability >99.8%. For cell type nomenclature, see La Manno et al., 2016.

(E) Expression levels of *Znr3* and *Rnf43* by TruSeq RNA-seq analysis of VM tissue obtained from *TH-GFP* mice over timepoints E11.5 to E14.5 (Toledo et al., 2017a).

(F) Expression levels of *App* and *Lrp8* by TruSeq RNA-seq analysis of VM tissue obtained from *TH-GFP* mice over timepoints E11.5 to E14.5 (Toledo et al., 2017a).

(G) E13.5 mouse head ISH (image data from Allen Institute for Brain Science: Allen Developing Mouse Brain Atlas) for *App* and *Lrp8* at E13.5. Sagittal sections through the midline. Scale bars, 500  $\mu$ m.

**A**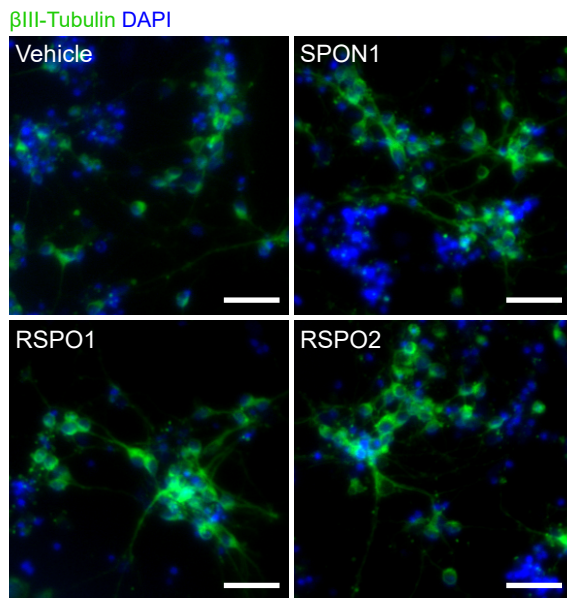**B**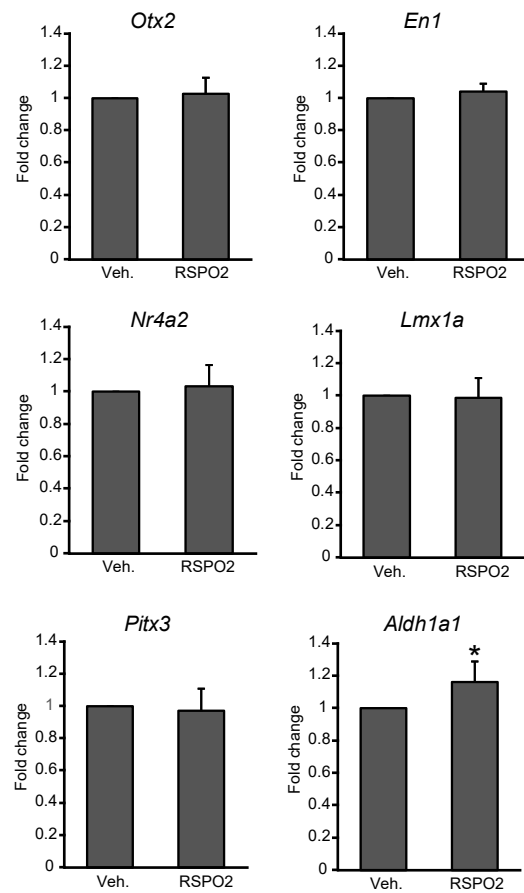

**Figure S3. Primary mouse cell culture. Related to Figure 3 and Table S1.**

(A) ICC staining with  $\beta$ III-tubulin antibodies and DAPI showed no differences between conditions. Scale bar, 50  $\mu$ m.

(B) Expression of *Otx2*, *En1*, *Nr4a2*, *Lmx1a*, *Pitx3*, and *Aldh1a1* measured by qPCR at the end primary cell culture. Statistical analysis compared to Vehicle treated control. \* $p < 0.05$  by t-test. Data presented as means  $\pm$  standard deviation measured in arbitrary units.

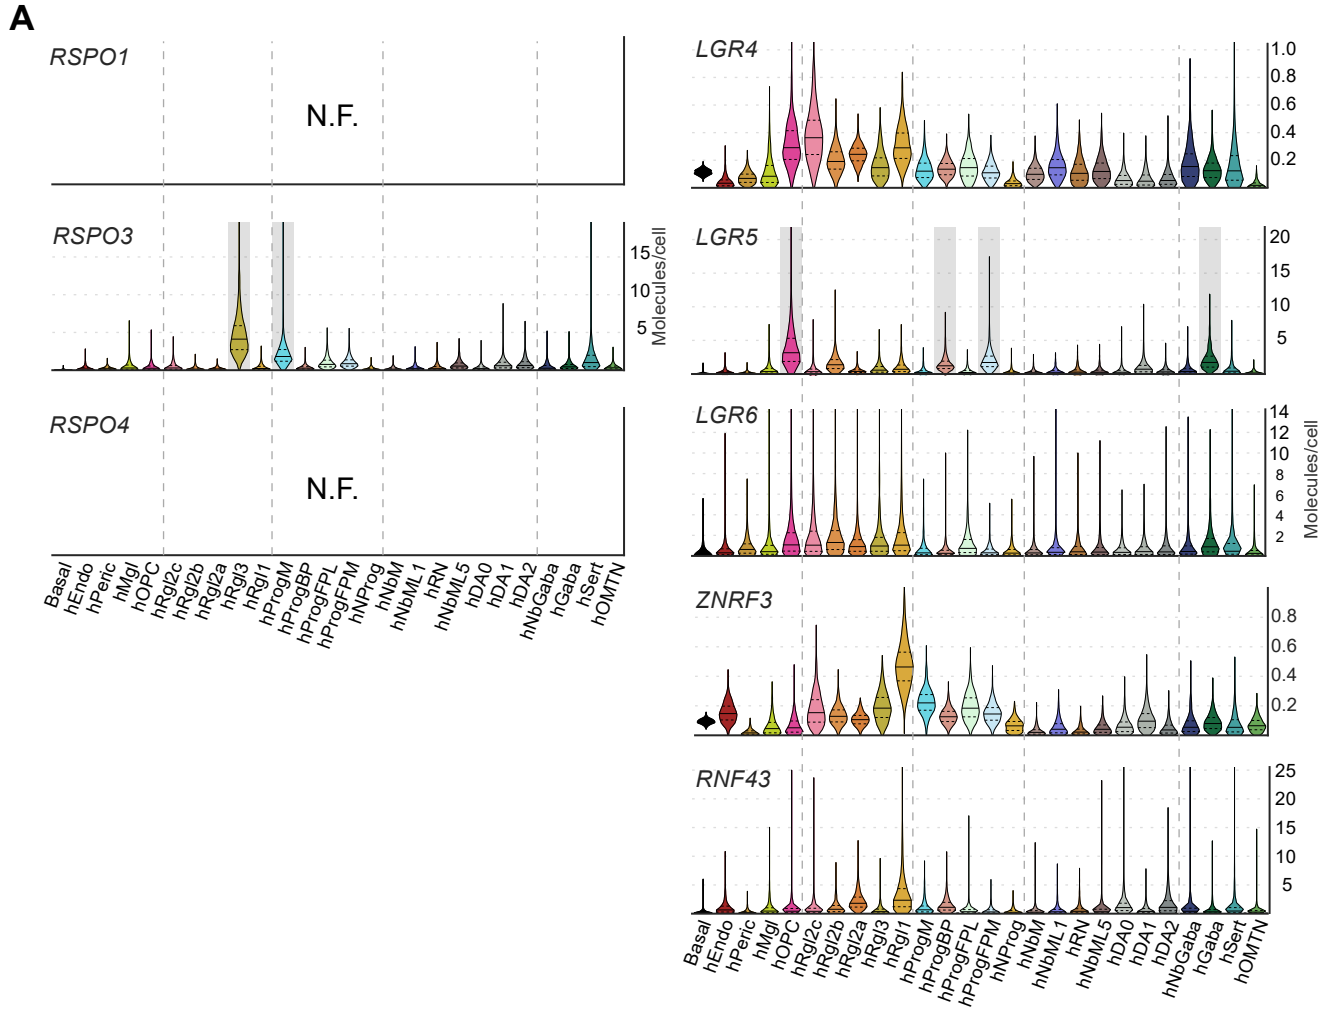

**Figure S4. Single-cell expression of Spondin related genes in the human ventral midbrain. Related to Figure 5.** (A) Violin plots generated from single-cell RNA-seq data of the developing human VM. *RSPO1*, *RSPO3*, *RSPO4*, *LGR4*, *LGR5*, *LGR6*, *ZNRF3*, and *RNF43* expression levels are shown across all known cell types. Right axis shows absolute molecule counts (N.F. = not found). Grey, enriched over baseline with posterior probability >99.8%. For human cell type nomenclature, see La Manno et al., 2016.

| Gene     | Forward               | Reverse                 |
|----------|-----------------------|-------------------------|
| Rspo1    | ggagggagaatgccaaca    | actgatgtgagtggccctgt    |
| Rspo2    | tgaatgccagatggtttgc   | atctgccgtgttctggttc     |
| Rspo3    | agctcctcctctgacagcaa  | ctgtctcgggctcttctctt    |
| Rspo4    | ggagtgccaggaagagtgtg  | ggacccgggttctaggc       |
| Spon1    | actgtgcaacgcaagaagtg  | attctgaccaggctgtccac    |
|          |                       |                         |
| hOtx2    | acaagtggccaattcactcc  | gaggtggacaagggatctga    |
| hEn1     | gagcgcagggcaccacaata  | cgagtcagtttgaccacgg     |
| hPitx3   | ccgtgtcctgcccttatgc   | gggtcccgatagacgtagg     |
| hNr4a2   | gttcagggcagatgggtc    | ctcccgaagagtggtaactgt   |
| hAldh1a1 | gcacgccagacttacctgtc  | cctcctcagttgcaggattaaag |
| hHPRT    | cctggcgtcgtgattagtgat | agacgttcagtcctgtccataa  |
|          |                       |                         |
| mNr4a2   | gcatacaggtccaaccagt   | aatgcaggagaaggcagaaa    |
| mPitx3   | gcaactggccgccaagg     | aggccccacgttgaccga      |
| mAldh1a1 | gacaggtttccagattggctc | aagactttcccaccattgagtgc |
| mOtx2    | tcgaagagtaagtgccgcc   | ggcaatggttgggactgagg    |
| mEn1     | tctctgggtacctctgcac   | tccagaaaaggaaggggatt    |
| mLmx1a   | ggaccataagcgacccaaac  | cctgaaccacacggacactc    |
| mGapdh   | tggcctccaaggagtaagaa  | tgtgaggagatgctcagtg     |

**Table S1. Primer Sequences for qPCR. Related to Figure 1, 5, and S3.**
